# Supplementary material for: Distribution and Prevalence of Anaplasmataceae, Rickettsiaceae and Coxiellaceae in African Ticks: A Systematic Review and Meta-Analysis
Source: Microorganisms. 2023 Mar 9;11(3):714. doi: 10.3390/microorganisms11030714 (PMC10051480; doi:10.3390/microorganisms11030714)
Supplement: Supplementary file 1 [file microorganisms-11-00714-s001.zip]

Archive with 4 entries (4 files):
- Table_S1.pdf
- Table_S2.pdf
- Table_S3_revised.pdf
- Table_S4.pdf
