# Supplementary material for: Distribution and Prevalence of Anaplasmataceae, Rickettsiaceae and Coxiellaceae in African Ticks: A Systematic Review and Meta-Analysis
Source: Microorganisms. 2023 Mar 9;11(3):714. doi: 10.3390/microorganisms11030714 (PMC10051480; doi:10.3390/microorganisms11030714)
Supplement: Supplementary file 1 [file microorganisms-11-00714-s001.zip › Table_S3_revised.pdf]

| Pathogen_species           | Sampling_country                                                                                 | Tick_species                        | References |
|----------------------------|--------------------------------------------------------------------------------------------------|-------------------------------------|------------|
| <i>Anaplasma bovis</i>     | 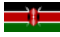 Kenya          | <i>Amblyomma gemma</i>              | [65]       |
|                            |                                                                                                  | <i>Amblyomma variegatum</i>         |            |
|                            |                                                                                                  | <i>Hyalomma rufipes</i>             |            |
|                            |                                                                                                  | <i>Hyalomma truncatum</i>           |            |
|                            |                                                                                                  | <i>Rhipicephalus appendiculatus</i> | [139]      |
|                            |                                                                                                  | <i>Rhipicephalus evertsi</i>        | [65]       |
|                            |                                                                                                  | <i>Rhipicephalus praetextatus</i>   |            |
|                            |                                                                                                  | <i>Rhipicephalus pulchellus</i>     |            |
|                            | 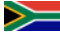 South Africa   | <i>Rhipicephalus decoloratus</i>    | [53]       |
|                            |                                                                                                  | <i>Rhipicephalus evertsi</i>        |            |
|                            |                                                                                                  | <i>Rhipicephalus evertsi</i>        | [71]       |
|                            | 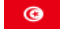 Tunisia        | <i>Hyalomma dromedarii</i>          | [148]      |
| <i>Anaplasma centrale</i>  | 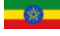 Ethiopia       | <i>Amblyomma lepidum</i>            | [105]      |
|                            |                                                                                                  | <i>Amblyomma variegatum</i>         |            |
|                            | 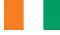 Ivory Coast    | <i>Amblyomma variegatum</i>         | [55]       |
|                            | 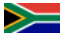 South Africa   | <i>Rhipicephalus gertrudae</i>      | [53]       |
|                            | 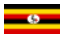 Uganda        | <i>Rhipicephalus pulchellus</i>     | [54]       |
| <i>Anaplasma marginale</i> | 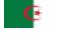 Algeria      | <i>Rhipicephalus annulatus</i>      | [89]       |
|                            | 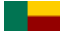 Benin        | <i>Amblyomma variegatum</i>         | [183]      |
|                            | 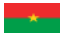 Burkina Faso | <i>Rhipicephalus decoloratus</i>    | [56]       |
|                            | 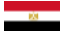 Egypt        | <i>Hyalomma excavatum</i>           | [142]      |
|                            |                                                                                                  |                                     | [74]       |

|                                                                                                                 |                                     |       |
|-----------------------------------------------------------------------------------------------------------------|-------------------------------------|-------|
|                                                                                                                 |                                     | [142] |
|                                                                                                                 | <i>Rhipicephalus annulatus</i>      | [141] |
|                                                                                                                 |                                     | [74]  |
|                                                                                                                 | <i>Rhipicephalus sanguineus</i>     | [145] |
|                                                                                                                 | <i>Amblyomma cohaerens</i>          | [116] |
| 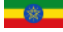 Ethiopia                      | <i>Amblyomma lepidum</i>            | [105] |
|                                                                                                                 | <i>Amblyomma variegatum</i>         |       |
| 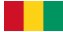 Guinea                        | <i>Rhipicephalus geigy</i>          | [121] |
|                                                                                                                 | <i>Rhipicephalus microplus</i>      |       |
| 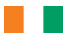 Ivory Coast                   | <i>Rhipicephalus microplus</i>      | [55]  |
| 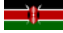 Kenya                         | <i>Rhipicephalus decoloratus</i>    | [59]  |
| 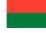 Madagascar                    | <i>Amblyomma variegatum</i>         | [132] |
|                                                                                                                 | <i>Rhipicephalus microplus</i>      |       |
|                                                                                                                 | <i>Rhipicephalus decoloratus</i>    | [53]  |
| 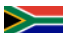 South Africa                  |                                     | [115] |
|                                                                                                                 | <i>Rhipicephalus evertsi</i>        | [53]  |
|                                                                                                                 | <i>Rhipicephalus gertrudae</i>      |       |
|                                                                                                                 | <i>Amblyomma gemma</i>              |       |
|                                                                                                                 | <i>Rhipicephalus appendiculatus</i> |       |
| 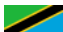 United Republic of Tanzania | <i>Rhipicephalus compositus</i>     | [114] |
|                                                                                                                 | <i>Rhipicephalus decoloratus</i>    |       |
|                                                                                                                 | <i>Rhipicephalus praetextatus</i>   |       |
|                                                                                                                 | <i>Rhipicephalus pulchellus</i>     |       |
| Zambia                                                                                                          | <i>Argas walkerae</i>               | [147] |
| <i>Anaplasma ovis</i>                                                                                           | <i>Rhipicephalus bursa</i>          | [110] |

|                                  |                                                                                                  |                                     |       |
|----------------------------------|--------------------------------------------------------------------------------------------------|-------------------------------------|-------|
| <i>Anaplasma phagocytophilum</i> | 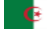 Algeria        | <i>Rhipicephalus turanicus</i>      |       |
|                                  | 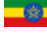 Ethiopia       | <i>Rhipicephalus decoloratus</i>    | [105] |
|                                  |                                                                                                  | <i>Rhipicephalus evertsi</i>        |       |
|                                  |                                                                                                  | <i>Amblyomma gemma</i>              |       |
|                                  | 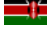 Kenya          | <i>Amblyomma variegatum</i>         | [65]  |
|                                  |                                                                                                  | <i>Rhipicephalus appendiculatus</i> |       |
|                                  |                                                                                                  | <i>Rhipicephalus appendiculatus</i> | [139] |
|                                  |                                                                                                  | <i>Rhipicephalus decoloratus</i>    |       |
|                                  |                                                                                                  | <i>Rhipicephalus evertsi</i>        | [59]  |
|                                  |                                                                                                  | <i>Rhipicephalus evertsi</i>        | [139] |
|                                  |                                                                                                  | <i>Rhipicephalus pulchellus</i>     | [65]  |
|                                  | 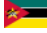 Mozambique     | <i>Rhipicephalus microplus</i>      | [103] |
|                                  | 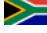 South Africa   | <i>Amblyomma hebraeum</i>           | [71]  |
|                                  |                                                                                                  | <i>Rhipicephalus evertsi</i>        | [53]  |
|                                  | 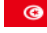 Tunisia        | <i>Rhipicephalus sanguineus</i>     | [111] |
|                                  |                                                                                                  | <i>Rhipicephalus turanicus</i>      |       |
| <i>Anaplasma phagocytophilum</i> | 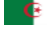 Algeria      | <i>Argas persicus</i>               | [89]  |
|                                  | 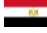 Egypt        | <i>Rhipicephalus sanguineus</i>     | [145] |
|                                  |                                                                                                  | <i>Amblyomma cohaerens</i>          | [116] |
|                                  | 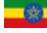 Ethiopia     | <i>Amblyomma lepidum</i>            |       |
|                                  |                                                                                                  | <i>Amblyomma variegatum</i>         | [105] |
|                                  | 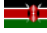 Kenya        | <i>Rhipicephalus maculatus</i>      | [127] |
|                                  | 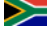 South Africa | <i>Amblyomma hebraeum</i>           | [124] |
|                                  |                                                                                                  | <i>Haemaphysalis elliptica</i>      | [125] |

|                         |                                                                                                                    |                                     |       |
|-------------------------|--------------------------------------------------------------------------------------------------------------------|-------------------------------------|-------|
| <i>Anaplasma platys</i> |                                                                                                                    | <i>Rhipicephalus decoloratus</i>    | [124] |
|                         |                                                                                                                    | <i>Rhipicephalus evertsi</i>        |       |
|                         |                                                                                                                    | <i>Rhipicephalus sanguineus</i>     | [125] |
|                         | 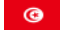 Tunisia                          | <i>Hyalomma detritum</i>            | [104] |
|                         |                                                                                                                    | <i>Hyalomma marginatum</i>          | [123] |
|                         |                                                                                                                    | <i>Ixodes ricinus</i>               | [104] |
|                         | 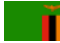 Zambia                           | <i>Ornithodoros moubata</i>         | [147] |
|                         | 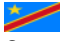 Democratic Republic of the Congo | <i>Rhipicephalus sanguineus</i>     | [133] |
|                         |                                                                                                                    | <i>Hyalomma excavatum</i>           | [142] |
|                         | 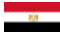 Egypt                            | <i>Rhipicephalus annulatus</i>      |       |
|                         |                                                                                                                    | <i>Rhipicephalus annulatus</i>      | [141] |
|                         |                                                                                                                    | <i>Rhipicephalus sanguineus</i>     | [145] |
|                         | 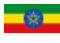 Ethiopia                         | <i>Rhipicephalus decoloratus</i>    | [76]  |
|                         | 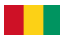 Guinea                           | <i>Rhipicephalus microplus</i>      | [121] |
|                         |                                                                                                                    | <i>Rhipicephalus appendiculatus</i> | [59]  |
|                         |                                                                                                                    | <i>Rhipicephalus camicasi</i>       | [122] |
|                         |                                                                                                                    | <i>Rhipicephalus decoloratus</i>    | [59]  |
|                         |                                                                                                                    | <i>Rhipicephalus evertsi</i>        | [65]  |
|                         |                                                                                                                    | <i>Rhipicephalus pravus</i>         |       |
|                         | 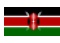 Kenya                          | <i>Rhipicephalus pulchellus</i>     |       |
|                         |                                                                                                                    | <i>Amblyomma variegatum</i>         |       |
|                         |                                                                                                                    | <i>Rhipicephalus sanguineus</i>     |       |
|                         | N/A                                                                                                                | <i>Rhipicephalus sanguineus</i>     | [122] |
|                         |                                                                                                                    | <i>Rhipicephalus evertsi</i>        | [53]  |

|                                       |                                                                                                               |                                 |       |
|---------------------------------------|---------------------------------------------------------------------------------------------------------------|---------------------------------|-------|
| <i>Anaplasma spp.</i>                 | 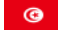 Tunisia                     | <i>Hyalomma dromedarii</i>      | [134] |
|                                       |                                                                                                               | <i>Rhipicephalus sanguineus</i> | [104] |
|                                       | 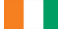 Ivory Coast                 | <i>Amblyomma variegatum</i>     |       |
|                                       |                                                                                                               | <i>Hyalomma truncatum</i>       | [55]  |
|                                       |                                                                                                               | <i>Rhipicephalus microplus</i>  |       |
|                                       |  Tunisia                     | <i>Hyalomma dromedarii</i>      | [148] |
|                                       |                                                                                                               | <i>Hyalomma excavatum</i>       |       |
|                                       | 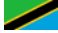 United Republic of Tanzania | <i>Amblyomma gemma</i>          | [117] |
|                                       | 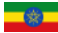 Ethiopia                    | <i>Amblyomma lepidum</i>        | [105] |
|                                       |                                                                                                               | <i>Amblyomma variegatum</i>     |       |
| <i>Candidatus Anaplasma ivorensis</i> | 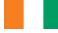 Ivory Coast                 | <i>Amblyomma variegatum</i>     | [55]  |
| <i>Candidatus Ehrlichia rustica</i>   | 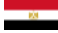 Egypt                       | <i>Rhipicephalus annulatus</i>  | [141] |
|                                       |                                                                                                               | <i>Amblyomma variegatum</i>     |       |
|                                       | 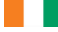 Ivory Coast               | <i>Hyalomma truncatum</i>       |       |
|                                       |                                                                                                               | <i>Rhipicephalus microplus</i>  | [55]  |
|                                       |                                                                                                               | <i>Amblyomma variegatum</i>     |       |
| <i>Candidatus Ehrlichia urmitei</i>   |                                                                                                               | <i>Hyalomma truncatum</i>       |       |

|                                         |                                                                                              |                                 |       |
|-----------------------------------------|----------------------------------------------------------------------------------------------|---------------------------------|-------|
|                                         |                                                                                              | <i>Rhipicephalus microplus</i>  |       |
| <i>Candidatus Rickettsia barbariae</i>  | 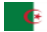 Algeria    | <i>Hyalomma excavatum</i>       | [67]  |
|                                         |                                                                                              | <i>Rhipicephalus bursa</i>      |       |
|                                         | 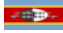 Swaziland  | <i>Rhipicephalus simus</i>      | [117] |
| <i>Candidatus Rickettsia kastelanii</i> | 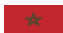 Morocco    | <i>Haemaphysalis punctata</i>   | [94]  |
|                                         |                                                                                              | <i>Haemaphysalis sulcata</i>    |       |
| <i>Coxiella burnetii</i>                | 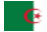 Algeria    | <i>Haemaphysalis erinacei</i>   | [143] |
|                                         |                                                                                              | <i>Hyalomma excavatum</i>       | [67]  |
|                                         |                                                                                              | <i>Ixodes vespertilionis</i>    | [73]  |
|                                         |                                                                                              | <i>Rhipicephalus bursa</i>      | [67]  |
|                                         |                                                                                              |                                 | [110] |
|                                         |                                                                                              | <i>Rhipicephalus sanguineus</i> | [143] |
|                                         | 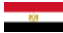 Egypt     | <i>Argas persicus</i>           |       |
|                                         |                                                                                              | <i>Hyalomma dromedarii</i>      | [74]  |
|                                         |                                                                                              | <i>Hyalomma excavatum</i>       |       |
|                                         |                                                                                              | <i>Rhipicephalus sanguineus</i> |       |
|                                         | 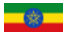 Ethiopia |                                 | [62]  |
|                                         |                                                                                              | <i>Amblyomma cohaerens</i>      | [178] |
|                                         |                                                                                              |                                 | [182] |
|                                         |                                                                                              | <i>Amblyomma gemma</i>          | [178] |
|                                         |                                                                                              |                                 | [62]  |
|                                         |                                                                                              | <i>Amblyomma variegatum</i>     | [178] |

|                                                                                               |                                     |       |
|-----------------------------------------------------------------------------------------------|-------------------------------------|-------|
|                                                                                               |                                     | [182] |
|                                                                                               | <i>Hyalomma rufipes</i>             | [178] |
|                                                                                               | <i>Rhipicephalus decoloratus</i>    | [62]  |
|                                                                                               | <i>Rhipicephalus decoloratus</i>    |       |
|                                                                                               | <i>Rhipicephalus praetextatus</i>   | [178] |
|                                                                                               | <i>Rhipicephalus pulchellus</i>     |       |
|                                                                                               | <i>Amblyomma variegatum</i>         |       |
|                                                                                               | <i>Hyalomma rufipes</i>             |       |
| 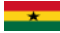 Ghana       | <i>Hyalomma truncatum</i>           | [175] |
|                                                                                               | <i>Rhipicephalus sanguineus</i>     |       |
|                                                                                               | <i>Rhipicephalus spp.</i>           |       |
| 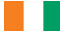 Ivory Coast | <i>Amblyomma variegatum</i>         | [55]  |
|                                                                                               | <i>Amblyomma gemma</i>              | [177] |
|                                                                                               | <i>Amblyomma variegatum</i>         |       |
|                                                                                               | <i>Haemaphysalis leachi</i>         | [176] |
|                                                                                               | <i>Rhipicephalus appendiculatus</i> | [177] |
|                                                                                               |                                     | [181] |
| 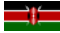 Kenya     | <i>Rhipicephalus decoloratus</i>    | [176] |
|                                                                                               | <i>Rhipicephalus evertsi</i>        | [177] |
|                                                                                               |                                     | [181] |
|                                                                                               | <i>Rhipicephalus pulchellus</i>     | [177] |
|                                                                                               |                                     | [181] |
|                                                                                               | <i>Rhipicephalus sanguineus</i>     | [176] |
| N/A                                                                                           | <i>Rhipicephalus pulchellus</i>     | [76]  |

|                      |                                                                                                |                                        |       |
|----------------------|------------------------------------------------------------------------------------------------|----------------------------------------|-------|
| <i>Coxiella</i> spp. | 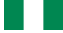 Nigeria      | <i>Hyalomma dromedarii</i>             | [168] |
|                      |                                                                                                | <i>Hyalomma truncatum</i>              |       |
|                      | 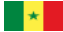 Senegal      | <i>Amblyomma variegatum</i>            | [180] |
|                      |                                                                                                | <i>Hyalomma rufipes</i>                |       |
|                      |                                                                                                | <i>Hyalomma truncatum</i>              |       |
|                      |                                                                                                | <i>Ornithodoros sonrai</i>             |       |
|                      |                                                                                                | <i>Rhipicephalus annulatus</i>         |       |
|                      |                                                                                                | <i>Rhipicephalus decoloratus</i>       |       |
|                      |                                                                                                | <i>Rhipicephalus evertsi</i>           |       |
|                      |                                                                                                | <i>Rhipicephalus guilhoni</i>          |       |
|                      | 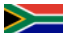 South Africa | <i>Amblyomma hebraeum</i>              | [71]  |
|                      |                                                                                                | <i>Haemaphysalis elliptica</i>         | [125] |
|                      |                                                                                                | <i>Rhipicephalus evertsi</i>           | [115] |
|                      |                                                                                                | <i>Rhipicephalus sanguineus</i>        | [125] |
|                      | 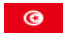 Tunisia      | <i>Hyalomma dromedarii</i>             | [134] |
|                      |                                                                                                | <i>Hyalomma impeltatum</i>             |       |
|                      | Angola                                                                                         | <i>Amblyomma variegatum</i>            | [146] |
|                      |                                                                                                | <i>Hyalomma truncatum</i>              |       |
|                      |                                                                                                | <i>Rhipicephalus decoloratus</i>       |       |
|                      |                                                                                                | <i>Rhipicephalus duttoni</i>           |       |
|                      |                                                                                                | <i>Rhipicephalus evertsi mimeticus</i> |       |
|                      |  Egypt      | <i>Rhipicephalus sanguineus</i>        | [76]  |
|                      | 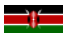 Kenya      | <i>Amblyomma cohaerens</i>             | [179] |
|                      |                                                                                                | <i>Amblyomma gemma</i>                 |       |

|                             |                                                                                             |                                     |       |
|-----------------------------|---------------------------------------------------------------------------------------------|-------------------------------------|-------|
|                             |                                                                                             | <i>Amblyomma lepidum</i>            |       |
|                             |                                                                                             | <i>Amblyomma personatum</i>         |       |
|                             |                                                                                             | <i>Amblyomma tholloni</i>           |       |
|                             |                                                                                             | <i>Haemaphysalis</i> spp.           |       |
|                             |                                                                                             | <i>Rhipicephalus appendiculatus</i> |       |
|                             |                                                                                             | <i>Rhipicephalus carnivoralis</i>   | [76]  |
|                             |                                                                                             | <i>Rhipicephalus compositus</i>     |       |
|                             |                                                                                             | <i>Rhipicephalus maculatus</i>      |       |
|                             |                                                                                             | <i>Rhipicephalus pravus</i>         |       |
|                             |                                                                                             | <i>Rhipicephalus</i> spp.           |       |
| N/A                         |                                                                                             | <i>Amblyomma gemma</i>              |       |
|                             |                                                                                             | <i>Amblyomma variegatum</i>         |       |
|                             |                                                                                             | <i>Hyalomma truncatum</i>           | [76]  |
|                             |                                                                                             | <i>Rhipicephalus evertsi</i>        |       |
|                             |                                                                                             | <i>Rhipicephalus praetextatus</i>   |       |
|                             |                                                                                             | <i>Rhipicephalus pulchellus</i>     |       |
|                             | 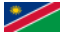 Namibia   | <i>Argas transgaripepinus</i>       | [169] |
|                             | 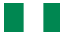 Nigeria | <i>Hyalomma dromedarii</i>          | [168] |
|                             |                                                                                             | <i>Hyalomma truncatum</i>           |       |
| Coxiella-like endosymbionts | 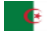 Algeria | <i>Dermacentor marginatus</i>       |       |
|                             |                                                                                             | <i>Haemaphysalis sulcata</i>        |       |
|                             |                                                                                             | <i>Hyalomma detritum</i>            | [26]  |
|                             |                                                                                             | <i>Hyalomma excavatum</i>           |       |
|                             |                                                                                             | <i>Hyalomma lusitanicum</i>         |       |
|                             |                                                                                             | <i>Hyalomma marginatum</i>          |       |

|                        |                                                                                                          |                                     |       |
|------------------------|----------------------------------------------------------------------------------------------------------|-------------------------------------|-------|
|                        | 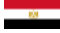 Egypt                  | <i>Rhipicephalus sanguineus</i>     | [76]  |
|                        |                                                                                                          | <i>Amblyomma eburneum</i>           | [127] |
|                        |                                                                                                          | <i>Amblyomma personatum</i>         |       |
|                        |                                                                                                          | <i>Amblyomma tholloni</i>           |       |
|                        |                                                                                                          | <i>Haemaphysalis spp.</i>           |       |
|                        | 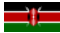 Kenya                  | <i>Rhipicephalus appendiculatus</i> |       |
|                        |                                                                                                          | <i>Rhipicephalus carnivoralis</i>   |       |
|                        |                                                                                                          | <i>Rhipicephalus compositus</i>     |       |
|                        |                                                                                                          | <i>Rhipicephalus maculatus</i>      | [76]  |
|                        |                                                                                                          | <i>Rhipicephalus pravus</i>         |       |
|                        |                                                                                                          | <i>Rhipicephalus spp.</i>           |       |
|                        |                                                                                                          | <i>Amblyomma gemma</i>              |       |
|                        |                                                                                                          | <i>Amblyomma variegatum</i>         |       |
|                        | N/A                                                                                                      | <i>Hyalomma truncatum</i>           |       |
|                        |                                                                                                          | <i>Rhipicephalus evertsi</i>        |       |
|                        |                                                                                                          | <i>Rhipicephalus praetextatus</i>   |       |
|                        | 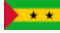 Sao Tome and Principe | <i>Amblyomma astrion</i>            | [157] |
|                        |                                                                                                          | <i>Amblyomma variegatum</i>         |       |
|                        |                                                                                                          |                                     | [82]  |
|                        | 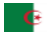 Algeria              |                                     |       |
| <i>Ehrlichia canis</i> |                                                                                                          | <i>Rhipicephalus sanguineus</i>     | [89]  |
|                        | 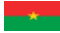 Burkina Faso         |                                     | [137] |

|                                                                                               |                                 |       |
|-----------------------------------------------------------------------------------------------|---------------------------------|-------|
|                                                                                               |                                 | [130] |
| 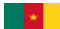 Cameroon    |                                 |       |
|                                                                                               |                                 | [129] |
| 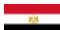 Egypt       |                                 | [145] |
| 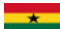 Ghana       |                                 | [137] |
| 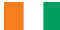 Ivory Coast |                                 | [135] |
|                                                                                               | <i>Rhipicephalus evertsi</i>    |       |
| 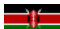 Kenya       | <i>Rhipicephalus pravus</i>     | [65]  |
|                                                                                               | <i>Rhipicephalus pulchellus</i> |       |
| 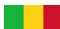 Mali      | <i>Rhipicephalus muhsamae</i>   |       |
|                                                                                               |                                 | [77]  |
| 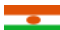 Niger     | <i>Hyalomma truncatum</i>       |       |

|                                   |                                                                                                |                                 |       |
|-----------------------------------|------------------------------------------------------------------------------------------------|---------------------------------|-------|
|                                   |                                                                                                | <i>Rhipicephalus evertsi</i>    | [71]  |
|                                   | 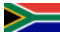 South Africa |                                 |       |
|                                   |                                                                                                | <i>Rhipicephalus sanguineus</i> | [125] |
|                                   |                                                                                                |                                 | [130] |
|                                   | 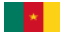 Cameroon     | <i>Rhipicephalus sanguineus</i> |       |
| <i>Ehrlichia chaffeensis</i>      |                                                                                                |                                 | [129] |
|                                   | 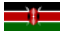 Kenya        | <i>Amblyomma spp.</i>           | [127] |
| <i>Ehrlichia chaffeensis-like</i> |  Egypt        | <i>Hyalomma excavatum</i>       | [142] |
| <i>Ehrlichia ewingii</i>          | 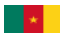 Cameroon     | <i>Rhipicephalus sanguineus</i> | [130] |
|                                   |                                                                                                | <i>Hyalomma excavatum</i>       |       |
|                                   | 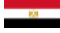 Egypt      |                                 | [142] |
| <i>Ehrlichia minasensis</i>       |                                                                                                | <i>Rhipicephalus annulatus</i>  |       |
|                                   | 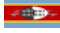 Swaziland  | <i>Rhipicephalus muehlensi</i>  | [117] |
|                                   |                                                                                                | <i>Rhipicephalus simus</i>      |       |

|                              |                                                                                                |                                     |       |
|------------------------------|------------------------------------------------------------------------------------------------|-------------------------------------|-------|
|                              |                                                                                                |                                     |       |
|                              |                                                                                                |                                     |       |
|                              | 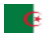 Algeria      | <i>Haemaphysalis sulcata</i>        | [89]  |
|                              |                                                                                                |                                     |       |
|                              |                                                                                                | <i>Rhipicephalus appendiculatus</i> |       |
| <i>Ehrlichia muris</i>       |                                                                                                |                                     |       |
|                              |                                                                                                | <i>Rhipicephalus evertsi</i>        | [140] |
|                              |                                                                                                |                                     |       |
|                              |                                                                                                | <i>Rhipicephalus sanguineus</i>     |       |
|                              |                                                                                                |                                     |       |
|                              | 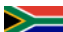 South Africa | <i>Hyalomma rufipes</i>             |       |
|                              |                                                                                                |                                     |       |
|                              |                                                                                                | <i>Rhipicephalus decoloratus</i>    |       |
| <i>Ehrlichia ovina</i>       |                                                                                                |                                     | [53]  |
|                              |                                                                                                | <i>Rhipicephalus evertsi</i>        |       |
|                              |                                                                                                |                                     |       |
|                              |                                                                                                | <i>Rhipicephalus gertrudae</i>      |       |
|                              |                                                                                                |                                     |       |
|                              | 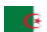 Algeria    | <i>Hyalomma aegyptium</i>           | [144] |
| <i>Ehrlichia ruminantium</i> |                                                                                                |                                     |       |
|                              | 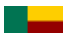 Benin      | <i>Amblyomma variegatum</i>         | [183] |

|                                                                                                |                                |       |
|------------------------------------------------------------------------------------------------|--------------------------------|-------|
|                                                                                                |                                | [56]  |
|                                                                                                | <i>Rhipicephalus microplus</i> | [50]  |
|                                                                                                |                                | [106] |
|                                                                                                | <i>Amblyomma variegatum</i>    |       |
| 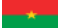 Burkina Faso |                                | [56]  |
|                                                                                                | <i>Rhipicephalus microplus</i> | [50]  |
| 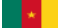 Cameroon     | <i>Amblyomma variegatum</i>    | [51]  |
|                                                                                                |                                | [116] |
|                                                                                                | <i>Amblyomma cohaerens</i>     |       |
|                                                                                                |                                | [138] |
| 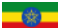 Ethiopia   |                                |       |
|                                                                                                |                                | [76]  |
|                                                                                                | <i>Amblyomma lepidum</i>       |       |
|                                                                                                |                                | [105] |

|                                                                                               |                                  |       |
|-----------------------------------------------------------------------------------------------|----------------------------------|-------|
|                                                                                               |                                  | [116] |
|                                                                                               | <i>Amblyomma variegatum</i>      |       |
|                                                                                               |                                  | [105] |
|                                                                                               | <i>Rhipicephalus decoloratus</i> | [105] |
| Gambia                                                                                        | <i>Amblyomma variegatum</i>      | [113] |
|                                                                                               | <i>Amblyomma variegatum</i>      | [55]  |
| 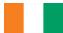 Ivory Coast | <i>Rhipicephalus microplus</i>   | [50]  |
|                                                                                               | <i>Amblyomma falsomarmoreum</i>  |       |
|                                                                                               | <i>Amblyomma gemma</i>           |       |
| 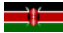 Kenya     | <i>Amblyomma nuttalli</i>        | [65]  |
|                                                                                               | <i>Amblyomma sparsum</i>         |       |

|                                                                                                  |                              |       |
|--------------------------------------------------------------------------------------------------|------------------------------|-------|
|                                                                                                  | <i>Amblyomma variegatum</i>  |       |
|                                                                                                  | <i>Hyalomma impeltatum</i>   | [76]  |
|                                                                                                  | <i>Rhipicephalus evertsi</i> | [65]  |
| N/A                                                                                              | <i>Amblyomma variegatum</i>  | [76]  |
|                                                                                                  |                              | [109] |
|                                                                                                  |                              | [53]  |
|                                                                                                  |                              | [112] |
| 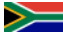 South Africa | <i>Amblyomma hebraeum</i>    | [115] |
|                                                                                                  |                              | [63]  |
|                                                                                                  |                              | [91]  |

|                                                                                             |                                  |       |
|---------------------------------------------------------------------------------------------|----------------------------------|-------|
|                                                                                             |                                  | [131] |
|                                                                                             | <i>Rhipicephalus decoloratus</i> | [115] |
|                                                                                             | <i>Amblyomma lepidum</i>         |       |
| 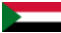 Sudan     |                                  | [126] |
|                                                                                             | <i>Amblyomma variegatum</i>      |       |
| 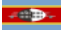 Swaziland | <i>Amblyomma hebraeum</i>        | [117] |
|                                                                                             | <i>Amblyomma gemma</i>           |       |
|                                                                                             | <i>Amblyomma lepidum</i>         | [54]  |
| 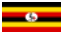 Uganda  | <i>Amblyomma variegatum</i>      |       |
|                                                                                             |                                  | [128] |
|                                                                                             | <i>Hyalomma truncatum</i>        | [54]  |

|                       |                                                                                                 |                                  |       |
|-----------------------|-------------------------------------------------------------------------------------------------|----------------------------------|-------|
| <i>Ehrlichia</i> spp. |                                                                                                 |                                  | [120] |
|                       | 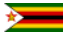 Zimbabwe      | <i>Amblyomma hebraeum</i>        |       |
|                       |                                                                                                 |                                  | [131] |
|                       | Angola                                                                                          | <i>Rhipicephalus decoloratus</i> | [146] |
|                       |                                                                                                 |                                  |       |
|                       |                                                                                                 |                                  | [130] |
|                       | 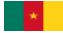 Cameroon      | <i>Rhipicephalus sanguineus</i>  |       |
|                       |                                                                                                 |                                  | [129] |
|                       |                                                                                                 | <i>Rhipicephalus annulatus</i>   |       |
|                       |                                                                                                 |                                  |       |
|                       | 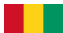 Guinea        | <i>Rhipicephalus geigy</i>       | [121] |
|                       |                                                                                                 |                                  |       |
|                       |                                                                                                 | <i>Rhipicephalus microplus</i>   |       |
|                       |                                                                                                 |                                  |       |
|                       |                                                                                                 | <i>Amblyomma variegatum</i>      |       |
|                       |  Ivory Coast |                                  | [55]  |
|                       |                                                                                                 | <i>Hyalomma truncatum</i>        |       |

|                                    |                                                                                                               |                                         |       |
|------------------------------------|---------------------------------------------------------------------------------------------------------------|-----------------------------------------|-------|
|                                    |                                                                                                               | <i>Rhipicephalus microplus</i>          |       |
|                                    | 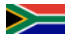 South Africa                | <i>Amblyomma and Rhipicephalus spp.</i> | [107] |
|                                    |                                                                                                               | <i>Amblyomma gemma</i>                  |       |
|                                    | 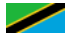 United Republic of Tanzania | <i>Amblyomma lepidum</i>                | [117] |
|                                    |                                                                                                               | <i>Amblyomma variegatum</i>             |       |
|                                    |                                                                                                               | <i>Hyalomma rufipes</i>                 |       |
| <i>Ehrlichia spp. (EU191229.1)</i> | 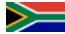 South Africa                | <i>Rhipicephalus decoloratus</i>        | [53]  |
|                                    |                                                                                                               | <i>Rhipicephalus evertsi</i>            |       |
|                                    |                                                                                                               | <i>Argas persicus</i>                   | [89]  |
| <i>Ehrlichia/Anaplasma spp.</i>    | 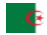 Algeria                   | <i>Haemaphysalis erinacei</i>           | [143] |
|                                    |                                                                                                               | <i>Hyalomma aegyptium</i>               | [144] |
|                                    |                                                                                                               | <i>Hyalomma detritum</i>                | [89]  |

|                                                                                              |                                  |       |
|----------------------------------------------------------------------------------------------|----------------------------------|-------|
|                                                                                              | <i>Ixodes ricinus</i>            |       |
|                                                                                              | <i>Rhipicephalus annulatus</i>   |       |
|                                                                                              | <i>Rhipicephalus bursa</i>       |       |
|                                                                                              |                                  | [143] |
|                                                                                              | <i>Rhipicephalus sanguineus</i>  | [89]  |
| 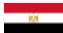 Egypt      | <i>Rhipicephalus annulatus</i>   | [141] |
|                                                                                              | <i>Amblyomma lepidum</i>         |       |
|                                                                                              |                                  | [76]  |
| 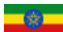 Ethiopia | <i>Rhipicephalus decoloratus</i> |       |
|                                                                                              |                                  | [105] |
|                                                                                              | <i>Rhipicephalus evertsi</i>     |       |
|                                                                                              | <i>Ixodes aulacodi</i>           | [102] |

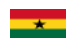

Ghana

*Hyalomma impeltatum*

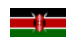

Kenya

[76]

*Rhipicephalus pravus*

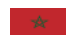

Morocco

*Ixodes ricinus*

[104]

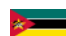

Mozambique

*Rhipicephalus microplus*

[103]

N/A

*Amblyomma variegatum*

[76]

[53]

*Amblyomma hebraeum*

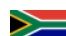

South Africa

[91]

*Haemaphysalis elliptica*

*Hyalomma rufipes*

[53]

*Rhipicephalus decoloratus*

|                                                                                            |                                 |       |
|--------------------------------------------------------------------------------------------|---------------------------------|-------|
| 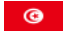 Tunisia | <i>Rhipicephalus evertsi</i>    |       |
|                                                                                            | <i>Rhipicephalus microplus</i>  |       |
|                                                                                            | <i>Rhipicephalus sanguineus</i> | [91]  |
|                                                                                            | <i>Rhipicephalus warburtoni</i> | [53]  |
|                                                                                            | <i>Hyalomma detritum</i>        | [104] |
|                                                                                            | <i>Hyalomma dromedarii</i>      | [148] |
|                                                                                            | <i>Hyalomma excavatum</i>       |       |
|                                                                                            | <i>Ixodes ricinus</i>           | [104] |
|                                                                                            | <i>Rhipicephalus sanguineus</i> |       |
|                                                                                            | <i>Haemaphysalis leachi</i>     | [93]  |

|                                        |                                                                                                  |                                   |       |
|----------------------------------------|--------------------------------------------------------------------------------------------------|-----------------------------------|-------|
|                                        | 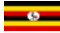 Uganda         | <i>Rhipicephalus praetextatus</i> |       |
|                                        |                                                                                                  | <i>Argas walkerae</i>             |       |
|                                        | 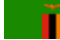 Zambia         | <i>Ornithodoros faini</i>         | [147] |
|                                        |                                                                                                  | <i>Ornithodoros moubata</i>       |       |
| <i>Neoehrlichia mikiurensis</i>        | 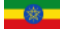 Ethiopia       | <i>Amblyomma cohaerens</i>        | [138] |
| <i>Neoehrlichia spp.</i>               | 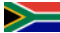 South Africa   | <i>Rhipicephalus sanguineus</i>   | [91]  |
| <i>Occidentia massiliensis</i>         | 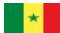 Senegal        | <i>Ornithodoros sonrai</i>        | [174] |
| <i>Panola Mountain Ehrlichia (PME)</i> | 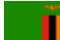 Zambia         | <i>Amblyomma variegatum</i>       | [119] |
|                                        |                                                                                                  | <i>Hyalomma aegyptium</i>         | [144] |
|                                        |                                                                                                  |                                   | [153] |
|                                        |                                                                                                  | <i>Hyalomma detritum</i>          | [154] |
|                                        |                                                                                                  | <i>Hyalomma dromedarii</i>        | [70]  |
|                                        | 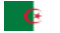 Algeria       |                                   | [67]  |
|                                        |                                                                                                  | <i>Hyalomma excavatum</i>         | [73]  |
| <i>Rickettsia aeschlimanni</i>         |                                                                                                  |                                   | [67]  |
|                                        |                                                                                                  | <i>Hyalomma marginatum</i>        | [154] |
|                                        |                                                                                                  | <i>Hyalomma scupense</i>          | [73]  |
|                                        | Angola                                                                                           | <i>Hyalomma truncatum</i>         | [146] |
|                                        | 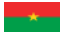 Burkina Faso | <i>Hyalomma rufipes</i>           | [81]  |
|                                        |                                                                                                  | <i>Hyalomma truncatum</i>         |       |

|                                                                                               |                                 |               |
|-----------------------------------------------------------------------------------------------|---------------------------------|---------------|
| 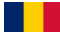 Chad        | <i>Hyalomma rufipes</i>         | [75]          |
| 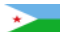 Djibouti    |                                 |               |
|                                                                                               | <i>Hyalomma dromedarii</i>      |               |
| 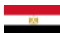 Egypt       | <i>Hyalomma impeltatum</i>      | [74]          |
|                                                                                               | <i>Hyalomma rufipes</i>         |               |
|                                                                                               | <i>Hyalomma impeltatum</i>      |               |
| 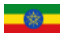 Ethiopia    | <i>Hyalomma rufipes</i>         | [81]          |
|                                                                                               | <i>Hyalomma truncatum</i>       |               |
| 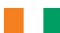 Ivory Coast | <i>Hyalomma marginatum</i>      | [55]          |
|                                                                                               | <i>Hyalomma truncatum</i>       |               |
|                                                                                               | <i>Amblyomma variegatum</i>     | [64]          |
|                                                                                               | <i>Hyalomma impeltatum</i>      | [76]          |
|                                                                                               | <i>Hyalomma marginatum</i>      | [64]          |
|                                                                                               |                                 | [76]          |
| 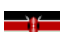 Kenya       | <i>Hyalomma rufipes</i>         | [65]          |
|                                                                                               |                                 | [64]          |
|                                                                                               | <i>Hyalomma truncatum</i>       | [65]          |
|                                                                                               |                                 | [64]          |
|                                                                                               | <i>Rhipicephalus pulchellus</i> | [65]          |
| 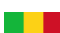 Mali      | <i>Hyalomma rufipes</i>         | [77]          |
| 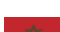 Morocco   | <i>Hyalomma marginatum</i>      | [151]<br>[94] |
| 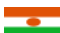 Niger     | <i>Hyalomma rufipes</i>         | [77]          |
|                                                                                               | <i>Hyalomma impeltatum</i>      | [72]          |

|                           |                                                                                                  |                                     |       |
|---------------------------|--------------------------------------------------------------------------------------------------|-------------------------------------|-------|
| <i>Rickettsia africae</i> | 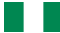 Nigeria        | <i>Hyalomma rufipes</i>             |       |
|                           |                                                                                                  | <i>Hyalomma impeltatum</i>          | [78]  |
|                           |                                                                                                  |                                     | [163] |
|                           |                                                                                                  | <i>Hyalomma rufipes</i>             | [78]  |
|                           | 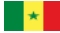 Senegal        | <i>Hyalomma truncatum</i>           | [163] |
|                           |                                                                                                  | <i>Rhipicephalus evertsi</i>        |       |
|                           |                                                                                                  | <i>Rhipicephalus evertsi</i>        | [78]  |
|                           |                                                                                                  | <i>Hyalomma rufipes</i>             |       |
|                           | 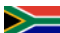 South Africa   | <i>Rhipicephalus appendiculatus</i> | [71]  |
|                           |                                                                                                  | <i>Rhipicephalus evertsi</i>        |       |
|                           | 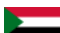 Sudan          | <i>Hyalomma rufipes</i>             | [80]  |
|                           |                                                                                                  | <i>Hyalomma dromedarii</i>          | [69]  |
|                           | 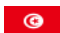 Tunisia        | <i>Hyalomma dromedarii</i>          | [79]  |
|                           |                                                                                                  | <i>Hyalomma impeltatum</i>          |       |
| <i>Rickettsia africae</i> |                                                                                                  | <i>Hyalomma aegyptium</i>           | [144] |
|                           | 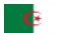 Algeria       | <i>Hyalomma aegyptium</i>           | [89]  |
|                           |                                                                                                  | <i>Hyalomma detritum</i>            |       |
|                           |                                                                                                  | <i>Hyalomma dromedarii</i>          | [90]  |
|                           |                                                                                                  |                                     | [150] |
|                           | Angola                                                                                           | <i>Amblyomma variegatum</i>         | [146] |
|                           |                                                                                                  | <i>Rhipicephalus decoloratus</i>    | [146] |
|                           |  Burkina Faso | <i>Amblyomma variegatum</i>         | [81]  |
|                           | 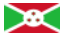 Burundi      | <i>Amblyomma variegatum</i>         | [77]  |
|                           |                                                                                                  |                                     |       |

|                                                                                                                    |                                     |       |
|--------------------------------------------------------------------------------------------------------------------|-------------------------------------|-------|
| 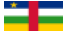 Central African Republic         | <i>Amblyomma variegatum</i>         |       |
|                                                                                                                    | <i>Rhipicephalus compositus</i>     | [60]  |
|                                                                                                                    | <i>Rhipicephalus muhsamae</i>       |       |
| 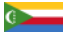 Comoros                          | <i>Amblyomma variegatum</i>         |       |
|                                                                                                                    | <i>Rhipicephalus appendiculatus</i> | [66]  |
|                                                                                                                    | <i>Rhipicephalus microplus</i>      |       |
| 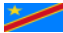 Democratic Republic of the Congo | <i>Amblyomma compressum</i>         | [163] |
|                                                                                                                    |                                     |       |
|                                                                                                                    |                                     |       |
| 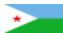 Djibouti                         | <i>Amblyomma lepidum</i>            | [75]  |
|                                                                                                                    |                                     | [96]  |
|                                                                                                                    | <i>Amblyomma variegatum</i>         | [75]  |
| 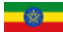 Ethiopia                         |                                     |       |
|                                                                                                                    | <i>Amblyomma cohaerens</i>          | [62]  |
|                                                                                                                    |                                     | [138] |
|                                                                                                                    | <i>Amblyomma gemma</i>              | [81]  |
|                                                                                                                    | <i>Amblyomma lepidum</i>            | [62]  |
|                                                                                                                    |                                     |       |
|                                                                                                                    | <i>Amblyomma variegatum</i>         | [62]  |
|                                                                                                                    |                                     | [138] |
|                                                                                                                    | <i>Rhipicephalus decoloratus</i>    |       |
| 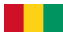 Guinea                         | <i>Rhipicephalus evertsi</i>        | [105] |
|                                                                                                                    | <i>Amblyomma variegatum</i>         |       |
|                                                                                                                    | <i>Haemaphysalis paraleachi</i>     |       |
|                                                                                                                    | <i>Hyalomma rufipes</i>             | [163] |
|                                                                                                                    | <i>Rhipicephalus annulatus</i>      |       |
|                                                                                                                    | <i>Rhipicephalus decoloratus</i>    |       |
|                                                                                                                    | <i>Amblyomma variegatum</i>         | [55]  |

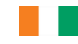 Ivory Coast

*Hyalomma impressum*

*Hyalomma marginatum*

*Hyalomma truncatum*

*Rhipicephalus microplus*

[164]

*Amblyomma eburneum*

[127]

[59]

[64]

*Amblyomma gemma*

[65]

[139]

*Amblyomma lepidum*

[64]

[59]

[160]

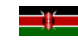 Kenya

*Amblyomma variegatum*

[92]

[65]

[139]

*Hyalomma impeltatum*

[76]

*Hyalomma truncatum*

[64]

[59]

*Rhipicephalus appendiculatus*

[160]

*Rhipicephalus decoloratus*

[59]

*Rhipicephalus evertsi*

[65]

*Rhipicephalus pulchellus*

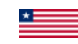 Liberia

*Amblyomma compressum*

[163]

*Amblyomma variegatum*

|                                                                                                  |                                     |       |
|--------------------------------------------------------------------------------------------------|-------------------------------------|-------|
|                                                                                                  | <i>Rhipicephalus geigy</i>          |       |
| 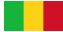 Mali           | <i>Amblyomma variegatum</i>         | [77]  |
| 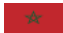 Morocco        | <i>Hyalomma aegyptium</i>           | [167] |
|                                                                                                  | <i>Amblyomma hebraeum</i>           | [161] |
| 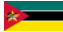 Mozambique     | <i>Amblyomma variegatum</i>         | [103] |
| N/A                                                                                              | <i>Amblyomma gemma</i>              | [76]  |
|                                                                                                  | <i>Amblyomma variegatum</i>         |       |
| 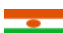 Niger          | <i>Amblyomma variegatum</i>         | [77]  |
| 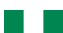 Nigeria        | <i>Amblyomma variegatum</i>         | [159] |
|                                                                                                  | <i>Amblyomma variegatum</i>         | [78]  |
| 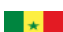 Senegal        | <i>Hyalomma rufipes</i>             |       |
|                                                                                                  | <i>Rhipicephalus annulatus</i>      | [163] |
|                                                                                                  | <i>Rhipicephalus evertsi</i>        |       |
|                                                                                                  |                                     | [61]  |
|                                                                                                  |                                     | [71]  |
|                                                                                                  | <i>Amblyomma hebraeum</i>           | [63]  |
| 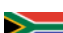 South Africa |                                     | [91]  |
|                                                                                                  | <i>Haemaphysalis elliptica</i>      |       |
|                                                                                                  | <i>Rhipicephalus appendiculatus</i> | [71]  |
|                                                                                                  | <i>Rhipicephalus evertsi</i>        |       |
| 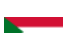 Sudan        | <i>Amblyomma lepidum</i>            | [77]  |
|                                                                                                  | <i>Hyalomma dromedarii</i>          | [80]  |

|                                              |                                                                                                            |                                     |       |
|----------------------------------------------|------------------------------------------------------------------------------------------------------------|-------------------------------------|-------|
|                                              | 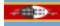 Swaziland                | <i>Amblyomma hebraeum</i>           | [117] |
|                                              | 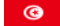 Tunisia                  | <i>Hyalomma dromedarii</i>          | [79]  |
|                                              |                                                                                                            | <i>Hyalomma impeltatum</i>          |       |
|                                              | 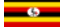 Uganda                   |                                     | [159] |
| <i>Rickettsia africae</i> São Tomé           | 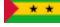 Sao Tome and Principe    | <i>Amblyomma variegatum</i>         | [157] |
| <i>Rickettsia akari</i>                      | 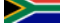 South Africa             | <i>Rhipicephalus sanguineus</i>     | [140] |
|                                              |                                                                                                            | <i>Rhipicephalus spp.</i>           |       |
|                                              | 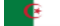 Algeria                  | <i>Rhipicephalus sanguineus</i>     | [82]  |
|                                              |                                                                                                            |                                     | [154] |
|                                              | 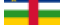 Central African Republic | <i>Rhipicephalus muhsamae</i>       | [60]  |
|                                              | 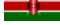 Kenya                    | <i>Rhipicephalus appendiculatus</i> | [64]  |
|                                              | 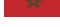 Morocco                  |                                     | [83]  |
|                                              |                                                                                                            | <i>Rhipicephalus sanguineus</i>     |       |
| <i>Rickettsia conorii</i>                    | 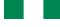 Nigeria                  |                                     | [84]  |
|                                              | 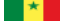 Senegal                  | <i>Rhipicephalus evertsi</i>        | [163] |
|                                              | 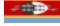 Swaziland                | <i>Haemaphysalis elliptica</i>      | [117] |
|                                              | 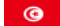 Tunisia                | <i>Rhipicephalus sanguineus</i>     | [86]  |
|                                              |                                                                                                            |                                     | [87]  |
|                                              | 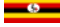 Uganda                 | <i>Haemaphysalis leachi</i>         | [93]  |
|                                              |                                                                                                            | <i>Haemaphysalis punctaleachi</i>   | [96]  |
| <i>Rickettsia conorii</i> ssp. <i>caspia</i> | 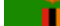 Zambia                 | <i>Rhipicephalus sanguineus</i>     | [155] |
| <i>Rickettsia helvetica</i>                  | 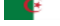 Algeria                |                                     | [90]  |
|                                              | 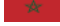 Morocco                | <i>Ixodes ricinus</i>               | [94]  |

|                                |                                                                                                              |                                   |       |
|--------------------------------|--------------------------------------------------------------------------------------------------------------|-----------------------------------|-------|
|                                |  Tunisia                    | <i>Hyalomma impeltatum</i>        | [79]  |
|                                |                                                                                                              | <i>Ixodes ricinus</i>             | [95]  |
| <i>Rickettsia hoogstraalii</i> | 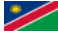 Namibia                    | <i>Argas transgaripepinus</i>     | [169] |
|                                | Zambia                                                                                                       | <i>Argas walkerae</i>             | [147] |
| <i>Rickettsia israelensis</i>  | 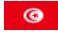 Tunisia                    | <i>Rhipicephalus sanguineus</i>   | [87]  |
| <i>Rickettsia japonica</i>     | 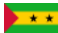 Sao Tome and Principe      | <i>Amblyomma variegatum</i>       | [157] |
| <i>Rickettsia lusitaniae</i>   | Zambia                                                                                                       | <i>Ornithodoros faini</i>         | [147] |
|                                |                                                                                                              | <i>Ornithodoros porcinus</i>      | [171] |
| <i>Rickettsia massiliae</i>    |                                                                                                              | <i>Rhipicephalus bursa</i>        | [73]  |
|                                |                                                                                                              |                                   | [143] |
|                                |                                                                                                              |                                   | [82]  |
|                                |                                                                                                              |                                   | [154] |
|                                |                                                                                                              | <i>Rhipicephalus sanguineus</i>   | [85]  |
|                                | 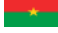 Burkina Faso               |                                   | [73]  |
|                                |                                                                                                              |                                   | [137] |
|                                |                                                                                                              | <i>Haemaphysalis leachi</i>       |       |
|                                |                                                                                                              | <i>Rhipicephalus lunulatus</i>    |       |
|                                |                                                                                                              | <i>Rhipicephalus muhsamae</i>     | [60]  |
| <i>Rickettsia massiliae</i>    | 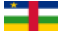 Central African Republic | <i>Rhipicephalus senegalensis</i> |       |
|                                |                                                                                                              | <i>Rhipicephalus sulcatus</i>     |       |
|                                |                                                                                                              | <i>Haemaphysalis paraleachi</i>   |       |
|                                | 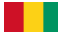 Guinea                   |                                   | [163] |
|                                | 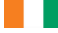 Ivory Coast              | <i>Rhipicephalus senegalensis</i> | [55]  |
|                                |                                                                                                              | <i>Rhipicephalus muhsamae</i>     | [77]  |

|                                  |                                                                                                |                                     |       |
|----------------------------------|------------------------------------------------------------------------------------------------|-------------------------------------|-------|
|                                  | 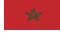 Morocco      | <i>Rhipicephalus sanguineus</i>     | [83]  |
|                                  |                                                                                                |                                     | [94]  |
|                                  | N/A                                                                                            | <i>Rhipicephalus praetextatus</i>   | [76]  |
|                                  |  Nigeria      | <i>Rhipicephalus turanicus</i>      | [172] |
|                                  | 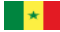 Senegal      | <i>Rhipicephalus guilhoni</i>       | [163] |
|                                  |  South Africa | <i>Amblyomma sylvaticum</i>         | [61]  |
|                                  |                                                                                                | <i>Rhipicephalus simus</i>          |       |
|                                  | 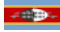 Swaziland    | <i>Haemaphysalis elliptica</i>      | [117] |
|                                  |                                                                                                | <i>Rhipicephalus simus</i>          |       |
|                                  | 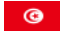 Tunisia      | <i>Rhipicephalus sanguineus</i>     | [87]  |
| <i>Rickettsia monacensis</i>     | 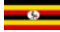 Uganda       | <i>Haemaphysalis leachi</i>         | [93]  |
|                                  | 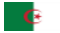 Algeria      | <i>Ixodes ricinus</i>               | [152] |
|                                  |                                                                                                |                                     | [89]  |
|                                  |                                                                                                |                                     | [98]  |
|                                  |                                                                                                |                                     | [90]  |
|                                  |                                                                                                |                                     | [83]  |
|                                  |                                                                                                |                                     | [94]  |
|                                  |  Tunisia    | <i>Hyalomma impeltatum</i>          | [79]  |
|                                  |                                                                                                | <i>Ixodes ricinus</i>               | [95]  |
| <i>Rickettsia mongolotimonae</i> | 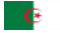 Algeria    | <i>Hyalomma aegyptium</i>           | [167] |
|                                  | 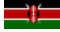 Kenya      | <i>Hyalomma unidentified</i>        | [64]  |
|                                  | 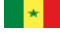 Senegal    | <i>Hyalomma truncatum</i>           | [163] |
| <i>Rickettsia montanensis</i>    |  Kenya      | <i>Rhipicephalus appendiculatus</i> | [64]  |
| <i>Rickettsia parkeri</i>        |                                                                                                | <i>Hyalomma truncatum</i>           |       |

|                                |                                                                                                            |                                 |       |
|--------------------------------|------------------------------------------------------------------------------------------------------------|---------------------------------|-------|
|                                |                                                                                                            | <i>Rhipicephalus pulchellus</i> |       |
| <i>Rickettsia raoultii</i>     | 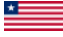 Liberia                  | <i>Ixodes muniensis</i>         | [163] |
|                                | 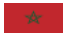 Morocco                  | <i>Dermacentor marginatus</i>   | [94]  |
| <i>Rickettsia rhipicephali</i> | 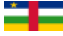 Central African Republic | <i>Rhipicephalus compositus</i> | [60]  |
|                                |                                                                                                            | <i>Rhipicephalus lunulatus</i>  |       |
|                                | 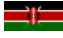 Kenya                    | <i>Amblyomma cohaerens</i>      | [76]  |
|                                |                                                                                                            | <i>Rhipicephalus evertsi</i>    | [65]  |
|                                |                                                                                                            | <i>Rhipicephalus pulchellus</i> |       |
| <i>Rickettsia slovaca</i>      | 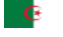 Algeria                  | <i>Dermacentor marginatus</i>   | [90]  |
|                                |                                                                                                            | <i>Haemaphysalis punctata</i>   | [73]  |
|                                | 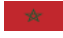 Morocco                  | <i>Dermacentor marginatus</i>   | [94]  |
| <i>Rickettsia sp. Ae-8</i>     | 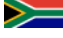 South Africa             | <i>Amblyomma exornatum</i>      | [173] |
| <i>Rickettsia spp.</i>         | 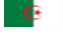 Algeria                | <i>Carios capensis</i>          | [13]  |
|                                |                                                                                                            | <i>Dermacentor marginatus</i>   | [90]  |
|                                |                                                                                                            | <i>Haemaphysalis erinacei</i>   | [143] |
|                                |                                                                                                            | <i>Haemaphysalis punctata</i>   | [85]  |
|                                |                                                                                                            | <i>Haemaphysalis sulcata</i>    | [73]  |
|                                |                                                                                                            | <i>Haemaphysalis sulcata</i>    | [89]  |
|                                |                                                                                                            | <i>Hyalomma aegyptium</i>       | [144] |
|                                |                                                                                                            | <i>Hyalomma aegyptium</i>       | [167] |
|                                |                                                                                                            | <i>Hyalomma dromedarii</i>      | [70]  |
|                                |                                                                                                            | <i>Hyalomma dromedarii</i>      | [90]  |

|                                                                                                              |                                   |       |
|--------------------------------------------------------------------------------------------------------------|-----------------------------------|-------|
|                                                                                                              | <i>Hyalomma excavatum</i>         | [73]  |
|                                                                                                              | <i>Hyalomma impeltatum</i>        | [70]  |
|                                                                                                              | <i>Hyalomma rufipes</i>           |       |
|                                                                                                              | <i>Hyalomma scupense</i>          | [73]  |
|                                                                                                              | <i>Ixodes ricinus</i>             | [90]  |
|                                                                                                              | <i>Ornithodoros erraticus</i>     | [13]  |
|                                                                                                              | <i>Ornithodoros rupestris</i>     |       |
|                                                                                                              | <i>Rhipicephalus bursa</i>        | [73]  |
|                                                                                                              |                                   | [143] |
|                                                                                                              | <i>Rhipicephalus sanguineus</i>   | [89]  |
|                                                                                                              |                                   | [85]  |
|                                                                                                              |                                   | [73]  |
| 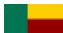 Benin                      | <i>Amblyomma variegatum</i>       | [108] |
| 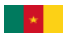 Cameroon                   | <i>Hyalomma rufipes</i>           | [170] |
|                                                                                                              | <i>Hyalomma truncatum</i>         |       |
|                                                                                                              | <i>Rhipicephalus lunulatus</i>    |       |
|                                                                                                              | <i>Amblyomma tholloni</i>         | [162] |
|                                                                                                              | <i>Amblyomma variegatum</i>       |       |
|                                                                                                              | <i>Haemaphysalis leachi</i>       |       |
| 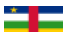 Central African Republic | <i>Rhipicephalus compositus</i>   |       |
|                                                                                                              | <i>Rhipicephalus lunulatus</i>    | [60]  |
|                                                                                                              | <i>Rhipicephalus muhsamae</i>     |       |
|                                                                                                              | <i>Rhipicephalus senegalensis</i> |       |
|                                                                                                              | <i>Rhipicephalus sulcatus</i>     |       |

|                                                                                                                    |                                  |       |
|--------------------------------------------------------------------------------------------------------------------|----------------------------------|-------|
| 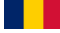 Chad                             | <i>Hyalomma rufipes</i>          | [75]  |
| 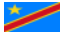 Democratic Republic of the Congo | <i>Amblyomma compressum</i>      | [163] |
|                                                                                                                    | <i>Amblyomma lepidum</i>         | [75]  |
| 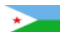 Djibouti                         | <i>Amblyomma variegatum</i>      | [96]  |
|                                                                                                                    | <i>Hyalomma rufipes</i>          | [75]  |
|                                                                                                                    | <i>Hyalomma dromedarii</i>       |       |
| 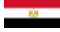 Egypt                            | <i>Hyalomma impeltatum</i>       | [149] |
|                                                                                                                    | <i>Hyalomma marginatum</i>       |       |
|                                                                                                                    | <i>Amblyomma cohaerens</i>       |       |
|                                                                                                                    | <i>Amblyomma lepidum</i>         | [62]  |
| 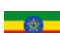 Ethiopia                         | <i>Amblyomma variegatum</i>      |       |
|                                                                                                                    | <i>Rhipicephalus decoloratus</i> |       |
|                                                                                                                    | <i>Rhipicephalus evertsi</i>     | [105] |
| 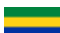 Gabon                           | <i>Amblyomma tholloni</i>        | [162] |
|                                                                                                                    | <i>Amblyomma variegatum</i>      |       |
|                                                                                                                    | <i>Hyalomma rufipes</i>          |       |
| 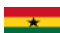 Ghana                          | <i>Hyalomma truncatum</i>        | [175] |
|                                                                                                                    | <i>Rhipicephalus evertsi</i>     |       |
|                                                                                                                    | <i>Rhipicephalus sanguineus</i>  |       |
|                                                                                                                    | <i>Rhipicephalus spp.</i>        |       |
| 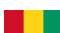 Guinea                         | <i>Amblyomma variegatum</i>      | [163] |
|                                                                                                                    | <i>Haemaphysalis paraleachi</i>  |       |

|                                                                                               |                                     |       |
|-----------------------------------------------------------------------------------------------|-------------------------------------|-------|
|                                                                                               | <i>Hyalomma rufipes</i>             |       |
|                                                                                               | <i>Rhipicephalus annulatus</i>      |       |
|                                                                                               | <i>Rhipicephalus decoloratus</i>    |       |
|                                                                                               | <i>Rhipicephalus senegalensis</i>   |       |
| 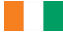 Ivory Coast | <i>Amblyomma variegatum</i>         |       |
|                                                                                               | <i>Hyalomma impressum</i>           |       |
|                                                                                               | <i>Hyalomma marginatum</i>          | [55]  |
|                                                                                               | <i>Hyalomma truncatum</i>           |       |
|                                                                                               | <i>Rhipicephalus microplus</i>      |       |
|                                                                                               | <i>Rhipicephalus senegalensis</i>   |       |
| 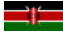 Kenya       | <i>Amblyomma cohaerens</i>          | [76]  |
|                                                                                               |                                     | [160] |
|                                                                                               | <i>Amblyomma variegatum</i>         |       |
|                                                                                               |                                     | [92]  |
|                                                                                               | <i>Haemaphysalis leachi</i>         |       |
|                                                                                               | <i>Hyalomma impeltatum</i>          | [76]  |
|                                                                                               | <i>Hyalomma rufipes</i>             |       |
|                                                                                               |                                     | [160] |
|                                                                                               | <i>Rhipicephalus appendiculatus</i> |       |
|                                                                                               |                                     | [92]  |
| 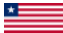 Liberia   | <i>Rhipicephalus decoloratus</i>    |       |
|                                                                                               | <i>Rhipicephalus maculatus</i>      | [164] |
|                                                                                               | <i>Rhipicephalus spp.</i>           | [92]  |
|                                                                                               | <i>Amblyomma compressum</i>         |       |
|                                                                                               | <i>Amblyomma variegatum</i>         | [163] |
|                                                                                               | <i>Ixodes muniensis</i>             |       |
|                                                                                               | <i>Rhipicephalus geigy</i>          |       |

|                                                                                              |                                   |       |
|----------------------------------------------------------------------------------------------|-----------------------------------|-------|
| 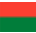 Madagascar | <i>Amblyomma variegatum</i>       | [158] |
|                                                                                              | <i>Dermacentor marginatus</i>     |       |
|                                                                                              | <i>Haemaphysalis punctata</i>     | [94]  |
|                                                                                              | <i>Haemaphysalis sulcata</i>      |       |
| 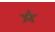 Morocco    | <i>Hyalomma aegyptium</i>         | [167] |
|                                                                                              | <i>Hyalomma marginatum</i>        |       |
|                                                                                              | <i>Ixodes ricinus</i>             | [94]  |
|                                                                                              | <i>Rhipicephalus sanguineus</i>   |       |
|                                                                                              | <i>Amblyomma hebraeum</i>         | [161] |
| 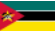 Mozambique | <i>Amblyomma variegatum</i>       | [103] |
|                                                                                              | <i>Amblyomma gemma</i>            |       |
| N/A                                                                                          | <i>Amblyomma variegatum</i>       | [76]  |
|                                                                                              | <i>Rhipicephalus praetextatus</i> |       |
| 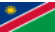 Namibia    | <i>Argas transgaripepinus</i>     | [169] |
|                                                                                              | <i>Amblyomma variegatum</i>       | [159] |
|                                                                                              |                                   | [72]  |
|                                                                                              | <i>Hyalomma dromedarii</i>        | [168] |
|                                                                                              |                                   | [72]  |
|                                                                                              | <i>Hyalomma impeltatum</i>        | [168] |
| 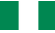 Nigeria  |                                   | [72]  |
|                                                                                              | <i>Hyalomma rufipes</i>           |       |
|                                                                                              |                                   | [168] |
|                                                                                              | <i>Hyalomma truncatum</i>         |       |
|                                                                                              | <i>Rhipicephalus sanguineus</i>   | [84]  |

|                                                                                                         |                                  |       |
|---------------------------------------------------------------------------------------------------------|----------------------------------|-------|
| 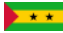 Sao Tome and Principe | <i>Amblyomma astrion</i>         | [157] |
|                                                                                                         | <i>Amblyomma variegatum</i>      |       |
|                                                                                                         |                                  | [78]  |
|                                                                                                         | <i>Hyalomma impeltatum</i>       |       |
|                                                                                                         |                                  | [163] |
| 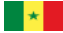 Senegal               | <i>Hyalomma rufipes</i>          | [78]  |
|                                                                                                         | <i>Hyalomma truncatum</i>        |       |
|                                                                                                         | <i>Rhipicephalus annulatus</i>   | [163] |
|                                                                                                         | <i>Rhipicephalus evertsi</i>     |       |
|                                                                                                         |                                  | [78]  |
|                                                                                                         | <i>Rhipicephalus guilhoni</i>    | [163] |
|                                                                                                         |                                  | [115] |
|                                                                                                         | <i>Amblyomma hebraeum</i>        | [61]  |
|                                                                                                         |                                  | [91]  |
|                                                                                                         | <i>Amblyomma sylvaticum</i>      | [61]  |
| 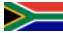 South Africa        | <i>Haemaphysalis elliptica</i>   | [91]  |
|                                                                                                         | <i>Rhipicephalus decoloratus</i> |       |
|                                                                                                         |                                  | [115] |
|                                                                                                         | <i>Rhipicephalus evertsi</i>     |       |
|                                                                                                         |                                  | [91]  |
|                                                                                                         | <i>Rhipicephalus sanguineus</i>  | [125] |
|                                                                                                         |                                  | [61]  |
|                                                                                                         | <i>Rhipicephalus simus</i>       | [71]  |
|                                                                                                         |                                  | [91]  |
|                                                                                                         |                                  |       |
| 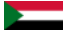 Sudan               | <i>Amblyomma variegatum</i>      | [166] |

|                                                                                                               |                                     |       |
|---------------------------------------------------------------------------------------------------------------|-------------------------------------|-------|
|  Tunisia                     | <i>Hyalomma dromedarii</i>          | [69]  |
|                                                                                                               | <i>Hyalomma impeltatum</i>          | [79]  |
|                                                                                                               | <i>Ixodes ricinus</i>               | [95]  |
|                                                                                                               | <i>Rhipicephalus sanguineus</i>     | [86]  |
|                                                                                                               |                                     | [87]  |
| 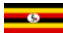 Uganda                      | <i>Amblyomma variegatum</i>         | [159] |
|                                                                                                               |                                     | [165] |
|                                                                                                               | <i>Haemaphysalis leachi</i>         | [93]  |
|                                                                                                               | <i>Haemaphysalis punctaleachi</i>   | [96]  |
|                                                                                                               | <i>Rhipicephalus praetextatus</i>   | [93]  |
| 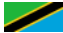 United Republic of Tanzania | <i>Amblyomma gemma</i>              |       |
|                                                                                                               | <i>Amblyomma lepidum</i>            |       |
|                                                                                                               | <i>Amblyomma marmoreum</i>          | [117] |
|                                                                                                               | <i>Amblyomma variegatum</i>         |       |
|                                                                                                               | <i>Ornithodoros moubata</i>         | [156] |
|                                                                                                               | <i>Rhipicephalus appendiculatus</i> |       |
|                                                                                                               | <i>Rhipicephalus evertsi</i>        |       |
|                                                                                                               | <i>Rhipicephalus muhsamae</i>       |       |
|                                                                                                               | <i>Rhipicephalus pravus</i>         | [117] |
|                                                                                                               | <i>Rhipicephalus pulchellus</i>     |       |
| Zambia                                                                                                        | <i>Rhipicephalus simus</i>          |       |
|                                                                                                               | <i>Argas walkerae</i>               |       |
|                                                                                                               | <i>Ornithodoros faini</i>           | [147] |
|                                                                                                               | <i>Amblyomma hebraeum</i>           | [88]  |

|                                                                                            |                                                                                                            |                                      |
|--------------------------------------------------------------------------------------------|------------------------------------------------------------------------------------------------------------|--------------------------------------|
| 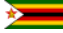 Zimbabwe | <i>Amblyomma rhinocerotis</i>                                                                              |                                      |
|                                                                                            | <i>Amblyomma sparsum</i>                                                                                   |                                      |
|                                                                                            | <i>Amblyomma variegatum</i>                                                                                |                                      |
|                                                                                            | <i>Haemaphysalis leachi</i>                                                                                |                                      |
|                                                                                            | <i>Hyalomma marginatum</i>                                                                                 |                                      |
|                                                                                            | <i>Hyalomma truncatum</i>                                                                                  |                                      |
|                                                                                            | <i>Rhipicephalus simus</i>                                                                                 |                                      |
| <i>Rickettsia</i> spp. (Davousti)                                                          | 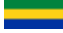 Gabon                    | <i>Amblyomma tholloni</i> [162]      |
| <i>Rickettsia</i> spp. (Uilenbergi)                                                        | 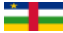 Central African Republic |                                      |
| <i>Rickettsiella</i> spp.                                                                  | 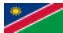 Namibia                  | <i>Argas transgaripepinus</i> [169]  |
| SFG <i>Rickettsia</i> spp.                                                                 | 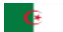 Algeria                  | <i>Ixodes ricinus</i> [89]           |
|                                                                                            |                                                                                                            | <i>Rhipicephalus sanguineus</i> [82] |
|                                                                                            | 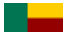 Benin                    | <i>Amblyomma variegatum</i> [108]    |
|                                                                                            | 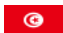 Tunisia                  | <i>Rhipicephalus sanguineus</i> [86] |
|                                                                                            |                                                                                                            |                                      |
