# Supplementary material for: Distribution and Prevalence of Anaplasmataceae, Rickettsiaceae and Coxiellaceae in African Ticks: A Systematic Review and Meta-Analysis
Source: Microorganisms. 2023 Mar 9;11(3):714. doi: 10.3390/microorganisms11030714 (PMC10051480; doi:10.3390/microorganisms11030714)
Supplement: Supplementary file 1 [file microorganisms-11-00714-s001.zip › Table_S4.pdf]

| Pub_authors                  | Q1 | Q2 | Q3 | Q4 | Q5 | Q6 | Q8 | Q9 | Q10 | Q11 | Q12 | Q15 | Q16 | Q17 | Q18 | Q19 | Q20 | TOT       | Risk bias |
|------------------------------|----|----|----|----|----|----|----|----|-----|-----|-----|-----|-----|-----|-----|-----|-----|-----------|-----------|
| Abdel-Shafy et al., 2012     | 1  | 0  | 0  | 1  | 0  | 0  | 1  | 1  | 0   | 1   | 1   | 1   | 1   | 1   | 0   | 1   | 0   | 0.5882353 | Moderate  |
| Abdelkadir et al., 2019      | 1  | 1  | 0  | 1  | 1  | 0  | 1  | 1  | 0   | 1   | 0   | 1   | 1   | 1   | 0   | 1   | 0   | 0.6470588 | Moderate  |
| Adakal et al., 2010          | 1  | 1  | 0  | 1  | 1  | 0  | 1  | 1  | 1   | 1   | 1   | 1   | 1   | 1   | 0   | 1   | 0   | 0.7647059 | Low       |
| Adelabu et al., 2020         | 1  | 1  | 0  | 1  | 1  | 0  | 1  | 1  | 0   | 1   | 0   | 1   | 1   | 1   | 0   | 1   | 1   | 0.7058824 | Low       |
| Adenyo et al., 2020          | 1  | 0  | 0  | 0  | 0  | 0  | 1  | 1  | 0   | 1   | 1   | 1   | 1   | 1   | 1   | 1   | 0   | 0.5882353 | Moderate  |
| Adjou Moumouni et al., 2018  | 1  | 1  | 0  | 1  | 1  | 0  | 1  | 1  | 1   | 1   | 1   | 1   | 1   | 1   | 1   | 1   | 1   | 0.8823529 | Low       |
| Adjou Moumouni et al., 2016  | 1  | 1  | 0  | 1  | 1  | 0  | 1  | 1  | 1   | 1   | 1   | 1   | 1   | 1   | 0   | 0   | 1   | 0.7647059 | Low       |
| Allsopp et al., 1999         | 1  | 1  | 0  | 1  | 0  | 1  | 1  | 1  | 0   | 1   | 1   | 1   | 1   | 1   | 1   | 0   | 0   | 0.7058824 | Low       |
| Aouadi et al., 2017          | 1  | 1  | 0  | 1  | 1  | 1  | 1  | 1  | 0   | 1   | 1   | 1   | 1   | 1   | 0   | 1   | 0   | 0.7647059 | Low       |
| Barradas et al., 2021        | 1  | 1  | 0  | 1  | 1  | 0  | 1  | 1  | 0   | 1   | 1   | 1   | 1   | 1   | 0   | 1   | 0   | 0.7058824 | Low       |
| Beati et al., 1995           | 1  | 0  | 0  | 1  | 0  | 0  | 1  | 1  | 0   | 1   | 1   | 1   | 1   | 1   | 1   | 1   | 0   | 0.6470588 | Moderate  |
| Beati et al., 1997           | 0  | 0  | 0  | 1  | 0  | 0  | 1  | 1  | 0   | 1   | 1   | 1   | 1   | 1   | 0   | 0   | 0   | 0.4705882 | High      |
| Belkhalia et al., 2019       | 1  | 1  | 0  | 1  | 0  | 0  | 1  | 1  | 0   | 1   | 0   | 1   | 1   | 1   | 0   | 1   | 0   | 0.5882353 | Moderate  |
| Benredjem et al., 2014       | 0  | 0  | 0  | 1  | 0  | 0  | 0  | 1  | 0   | 0   | 0   | 1   | 0   | 0   | 0   | 0   | 0   | 0.1764706 | High      |
| Berggoetz et al., 2014 (b)   | 1  | 1  | 0  | 1  | 1  | 0  | 1  | 1  | 1   | 1   | 0   | 1   | 0   | 1   | 0   | 1   | 0   | 0.6470588 | Moderate  |
| Bessas et al., 2016          | 1  | 0  | 0  | 1  | 0  | 0  | 1  | 1  | 0   | 1   | 1   | 1   | 1   | 1   | 0   | 1   | 1   | 0.6470588 | Moderate  |
| Biguezoton et al., 2016      | 1  | 0  | 0  | 1  | 0  | 0  | 1  | 1  | 0   | 1   | 0   | 1   | 1   | 1   | 0   | 1   | 1   | 0.5882353 | Moderate  |
| Bitam et al., 2009           | 0  | 0  | 0  | 0  | 0  | 0  | 0  | 1  | 0   | 0   | 1   | 1   | 1   | 1   | 0   | 0   | 0   | 0.2941176 | High      |
| Bitam et al., 2006           | 1  | 0  | 0  | 0  | 0  | 0  | 1  | 1  | 0   | 0   | 0   | 0   | 1   | 1   | 0   | 0   | 0   | 0.2941176 | High      |
| Boucheikhchoukh et al., 2018 | 0  | 0  | 0  | 1  | 0  | 0  | 0  | 1  | 0   | 1   | 0   | 0   | 1   | 1   | 1   | 1   | 1   | 0.4705882 | High      |
| Boudebouch et al., 2009      | 0  | 0  | 0  | 0  | 0  | 0  | 0  | 1  | 0   | 1   | 1   | 1   | 1   | 1   | 0   | 1   | 0   | 0.4117647 | High      |
| Bryson et al., 2002          | 1  | 0  | 0  | 1  | 0  | 0  | 0  | 1  | 0   | 1   | 1   | 1   | 1   | 1   | 0   | 1   | 0   | 0.5294118 | Moderate  |
| Byaruhanga et al., 2021      | 1  | 0  | 0  | 1  | 0  | 1  | 1  | 1  | 0   | 1   | 0   | 1   | 1   | 1   | 1   | 1   | 1   | 0.7058824 | Low       |
| Chitimia-Dobler et al., 2017 | 0  | 0  | 0  | 0  | 0  | 0  | 0  | 1  | 0   | 0   | 0   | 1   | 0   | 1   | 0   | 0   | 0   | 0.1764706 | High      |
| Chiuya et al., 2021          | 0  | 1  | 0  | 1  | 1  | 1  | 1  | 1  | 0   | 1   | 1   | 1   | 1   | 1   | 0   | 1   | 1   | 0.7647059 | Low       |
| Cutler et al., 2006          | 0  | 1  | 0  | 1  | 1  | 0  | 1  | 1  | 0   | 0   | 0   | 1   | 0   | 1   | 0   | 0   | 0   | 0.4117647 | High      |
| Demoncheaux et al., 2012     | 1  | 0  | 0  | 1  | 0  | 0  | 1  | 1  | 0   | 1   | 1   | 1   | 1   | 1   | 0   | 0   | 0   | 0.5294118 | Moderate  |
| Dib et al., 2009             | 1  | 0  | 0  | 0  | 0  | 0  | 1  | 1  | 0   | 1   | 1   | 1   | 1   | 1   | 0   | 0   | 0   | 0.4705882 | High      |
| Djerbouh et al., 2012        | 1  | 1  | 0  | 1  | 1  | 0  | 1  | 1  | 0   | 0   | 1   | 1   | 1   | 1   | 0   | 0   | 0   | 0.5882353 | Moderate  |
| Dupont et al., 1994          | 1  | 1  | 0  | 1  | 1  | 0  | 1  | 1  | 0   | 1   | 0   | 1   | 0   | 1   | 0   | 0   | 0   | 0.5294118 | Moderate  |
| Ehounoud et al., 2016        | 1  | 1  | 0  | 1  | 1  | 0  | 1  | 1  | 0   | 1   | 1   | 1   | 1   | 1   | 1   | 1   | 1   | 0.8235294 | Low       |
| Esemu et al., 2013           | 0  | 1  | 0  | 1  | 1  | 0  | 0  | 1  | 1   | 1   | 1   | 1   | 1   | 1   | 1   | 0   | 0   | 0.6470588 | Moderate  |
| Faburay et al., 2007         | 1  | 1  | 0  | 1  | 1  | 1  | 1  | 1  | 0   | 1   | 0   | 1   | 0   | 1   | 0   | 0   | 0   | 0.5882353 | Moderate  |
| Fyumagwa et al., 2009        | 1  | 1  | 0  | 1  | 1  | 1  | 1  | 1  | 0   | 1   | 0   | 1   | 1   | 1   | 0   | 0   | 0   | 0.6470588 | Moderate  |
| Guo et al., 2019             | 1  | 0  | 0  | 1  | 0  | 0  | 1  | 1  | 0   | 1   | 0   | 1   | 1   | 1   | 0   | 0   | 1   | 0.5294118 | Moderate  |
| Halajian et al., 2016        | 1  | 0  | 0  | 1  | 0  | 0  | 1  | 1  | 0   | 1   | 0   | 1   | 0   | 1   | 1   | 0   | 0   | 0.4705882 | High      |
| Halajian et al., 2018        | 1  | 0  | 0  | 1  | 0  | 0  | 1  | 1  | 0   | 0   | 0   | 1   | 1   | 1   | 0   | 1   | 0   | 0.4705882 | High      |
| Hornok et al., 2014          | 1  | 1  | 0  | 1  | 0  | 0  | 1  | 1  | 1   | 1   | 1   | 1   | 1   | 1   | 0   | 0   | 1   | 0.7058824 | Low       |
| Hornok et al., 2016          | 1  | 1  | 0  | 1  | 0  | 0  | 1  | 1  | 1   | 1   | 0   | 1   | 0   | 0   | 0   | 0   | 0   | 0.4705882 | High      |
| Hsi et al., 2020             | 1  | 0  | 0  | 1  | 0  | 1  | 1  | 1  | 0   | 1   | 1   | 1   | 1   | 1   | 0   | 1   | 1   | 0.7058824 | Low       |

| Pub_authors                   | Q1 | Q2 | Q3 | Q4 | Q5 | Q6 | Q8 | Q9 | Q10 | Q11 | Q12 | Q15 | Q16 | Q17 | Q18 | Q19 | Q20 | TOT       | Risk bias |
|-------------------------------|----|----|----|----|----|----|----|----|-----|-----|-----|-----|-----|-----|-----|-----|-----|-----------|-----------|
| Jonjejan et al., 2020         | 1  | 1  | 0  | 1  | 0  | 1  | 1  | 1  | 1   | 1   | 1   | 1   | 1   | 1   | 1   | 1   | 1   | 0.8823529 | Low       |
| Kamani et al., 2015           | 1  | 1  | 0  | 1  | 0  | 1  | 1  | 1  | 0   | 1   | 0   | 1   | 1   | 0   | 0   | 0   | 0   | 0.5294118 | Moderate  |
| Kamani et al., 2018           | 1  | 0  | 0  | 1  | 0  | 0  | 1  | 1  | 0   | 0   | 1   | 1   | 1   | 1   | 0   | 1   | 1   | 0.5882353 | Moderate  |
| Keller et al., 2016           | 0  | 0  | 0  | 1  | 0  | 1  | 0  | 1  | 0   | 1   | 1   | 1   | 1   | 1   | 1   | 1   | 1   | 0.6470588 | Moderate  |
| Kernif et al., 2012 (a)       | 1  | 1  | 0  | 1  | 0  | 0  | 1  | 1  | 0   | 1   | 1   | 1   | 1   | 1   | 0   | 1   | 0   | 0.6470588 | Moderate  |
| Kernif et al., 2012 (b)       | 1  | 1  | 0  | 0  | 0  | 0  | 1  | 1  | 0   | 1   | 1   | 1   | 1   | 1   | 0   | 0   | 0   | 0.5294118 | Moderate  |
| Khaldi et al., 2012           | 1  | 1  | 0  | 1  | 0  | 0  | 1  | 1  | 0   | 1   | 1   | 1   | 1   | 1   | 0   | 1   | 1   | 0.7058824 | Low       |
| Khrouf et al., 2014           | 1  | 1  | 0  | 1  | 1  | 0  | 1  | 1  | 1   | 1   | 1   | 1   | 1   | 1   | 0   | 1   | 0   | 0.7647059 | Low       |
| Kim et al., 2018              | 0  | 0  | 0  | 1  | 0  | 0  | 0  | 1  | 1   | 1   | 1   | 1   | 0   | 1   | 0   | 1   | 0   | 0.4705882 | High      |
| Knobel et al., 2013           | 1  | 1  | 0  | 1  | 1  | 1  | 1  | 1  | 0   | 1   | 1   | 1   | 1   | 1   | 0   | 0   | 1   | 0.7647059 | Low       |
| Koka et al., 2018             | 0  | 0  | 0  | 0  | 0  | 0  | 0  | 0  | 0   | 1   | 0   | 0   | 1   | 1   | 1   | 1   | 1   | 0.3529412 | High      |
| Koka et al., 2017             | 1  | 1  | 0  | 1  | 1  | 0  | 1  | 1  | 0   | 1   | 0   | 1   | 0   | 0   | 1   | 0   | 0   | 0.5294118 | Moderate  |
| Kolo et al., 2016             | 1  | 1  | 0  | 1  | 0  | 0  | 1  | 1  | 0   | 1   | 1   | 1   | 1   | 1   | 0   | 1   | 1   | 0.7058824 | Low       |
| Kumsa et al., 2015            | 1  | 1  | 0  | 1  | 1  | 0  | 1  | 1  | 1   | 1   | 1   | 1   | 1   | 1   | 1   | 0   | 1   | 0.8235294 | Low       |
| Lafri et al., 2015            | 0  | 0  | 0  | 1  | 0  | 0  | 0  | 1  | 0   | 1   | 0   | 1   | 0   | 1   | 0   | 1   | 0   | 0.3529412 | High      |
| Langguth et al., 2017         | 0  | 0  | 0  | 1  | 0  | 0  | 0  | 1  | 0   | 1   | 0   | 1   | 1   | 1   | 0   | 1   | 0   | 0.4117647 | High      |
| Ledger et al., 2021           | 1  | 1  | 0  | 1  | 1  | 0  | 1  | 1  | 1   | 0   | 0   | 1   | 1   | 1   | 1   | 1   | 0   | 0.7058824 | Low       |
| Leulmi et al., 2016           | 1  | 1  | 0  | 1  | 0  | 0  | 1  | 1  | 0   | 1   | 1   | 1   | 1   | 1   | 1   | 1   | 1   | 0.7647059 | Low       |
| Loftis et al., 2016           | 0  | 0  | 0  | 1  | 1  | 0  | 0  | 1  | 0   | 1   | 1   | 1   | 1   | 1   | 1   | 0   | 0   | 0.5294118 | Moderate  |
| Loftis et al., 2006           | 1  | 1  | 0  | 0  | 1  | 0  | 1  | 1  | 0   | 0   | 0   | 1   | 1   | 1   | 1   | 0   | 0   | 0.5294118 | Moderate  |
| Lorusso et al., 2013          | 1  | 0  | 0  | 1  | 1  | 0  | 0  | 1  | 0   | 1   | 0   | 1   | 1   | 1   | 0   | 0   | 1   | 0.5294118 | Moderate  |
| Macaluso et al., 2003         | 1  | 1  | 0  | 1  | 0  | 0  | 1  | 1  | 0   | 1   | 1   | 1   | 1   | 1   | 0   | 0   | 0   | 0.5882353 | Moderate  |
| Machado-Ferreira et al., 2016 | 0  | 0  | 0  | 1  | 0  | 0  | 0  | 0  | 0   | 1   | 0   | 1   | 1   | 1   | 0   | 0   | 0   | 0.2941176 | High      |
| Magaia et al., 2020           | 0  | 0  | 0  | 1  | 1  | 0  | 0  | 1  | 0   | 1   | 0   | 1   | 1   | 1   | 1   | 1   | 0   | 0.5294118 | Moderate  |
| Mahan et al., 1998            | 0  | 0  | 0  | 0  | 0  | 0  | 0  | 0  | 0   | 0   | 0   | 1   | 1   | 1   | 1   | 0   | 0   | 0.2352941 | High      |
| Maina et al., 2014            | 0  | 0  | 0  | 1  | 1  | 1  | 0  | 1  | 0   | 1   | 1   | 1   | 1   | 1   | 0   | 1   | 1   | 0.6470588 | Moderate  |
| Makenov et al., 2021          | 0  | 0  | 0  | 1  | 0  | 0  | 0  | 1  | 0   | 0   | 0   | 1   | 1   | 0   | 0   | 1   | 1   | 0.3529412 | High      |
| Matei et al., 2016            | 1  | 1  | 0  | 0  | 0  | 0  | 0  | 1  | 1   | 1   | 0   | 1   | 0   | 1   | 0   | 1   | 1   | 0.5294118 | Moderate  |
| Matsimbe et al., 2017         | 1  | 1  | 0  | 0  | 0  | 0  | 1  | 1  | 0   | 1   | 1   | 1   | 0   | 1   | 0   | 0   | 0   | 0.4705882 | High      |
| Matsumoto et al., 2007        | 0  | 0  | 0  | 1  | 0  | 0  | 0  | 1  | 0   | 1   | 1   | 1   | 1   | 1   | 0   | 0   | 0   | 0.4117647 | High      |
| Mediannikov et al., 2013      | 1  | 1  | 0  | 0  | 1  | 0  | 1  | 1  | 1   | 1   | 1   | 1   | 1   | 1   | 0   | 0   | 1   | 0.7058824 | Low       |
| Mediannikov et al., 2012 (a)  | 0  | 0  | 0  | 1  | 0  | 0  | 0  | 1  | 0   | 1   | 1   | 1   | 1   | 1   | 0   | 0   | 0   | 0.4117647 | High      |
| Mediannikov et al., 2012 (b)  | 0  | 0  | 0  | 1  | 1  | 0  | 1  | 1  | 0   | 1   | 1   | 1   | 1   | 1   | 0   | 0   | 0   | 0.5294118 | Moderate  |
| Mediannikov et al., 2010      | 1  | 1  | 0  | 1  | 1  | 0  | 1  | 1  | 1   | 1   | 1   | 1   | 1   | 1   | 0   | 1   | 1   | 0.8235294 | Low       |
| M'ghirbi et al., 2012         | 1  | 1  | 0  | 1  | 0  | 1  | 1  | 1  | 1   | 1   | 0   | 1   | 1   | 1   | 0   | 1   | 1   | 0.7647059 | Low       |
| Mtshali et al., 2016          | 1  | 1  | 0  | 1  | 0  | 0  | 1  | 1  | 0   | 0   | 0   | 1   | 0   | 1   | 0   | 0   | 1   | 0.4705882 | High      |
| Mtshali et al., 2017          | 1  | 1  | 0  | 1  | 0  | 0  | 0  | 1  | 1   | 0   | 0   | 1   | 0   | 1   | 0   | 1   | 0   | 0.4705882 | High      |
| Mura et al., 2008             | 1  | 1  | 0  | 1  | 0  | 0  | 1  | 1  | 0   | 1   | 1   | 1   | 1   | 1   | 0   | 1   | 1   | 0.7058824 | Low       |
| Muramatsu et al., 2005        | 1  | 1  | 0  | 1  | 0  | 0  | 1  | 1  | 0   | 0   | 1   | 1   | 1   | 1   | 0   | 0   | 0   | 0.5294118 | Moderate  |
| Mwamuye et al., 2016          | 1  | 1  | 0  | 1  | 0  | 0  | 1  | 1  | 0   | 0   | 0   | 1   | 0   | 1   | 0   | 0   | 0   | 0.4117647 | High      |

| Pub_authors                   | Q1 | Q2 | Q3 | Q4 | Q5 | Q6 | Q8 | Q9 | Q10 | Q11 | Q12 | Q15 | Q16 | Q17 | Q18 | Q19 | Q20 | TOT       | Risk bias |
|-------------------------------|----|----|----|----|----|----|----|----|-----|-----|-----|-----|-----|-----|-----|-----|-----|-----------|-----------|
| Mwamuye et al., 2017          | 1  | 1  | 0  | 1  | 0  | 0  | 1  | 1  | 0   | 1   | 0   | 1   | 0   | 1   | 1   | 0   | 0   | 0.5294118 | Moderate  |
| Nakao et al., 2013            | 1  | 1  | 0  | 1  | 1  | 1  | 1  | 1  | 0   | 0   | 1   | 1   | 1   | 1   | 0   | 0   | 0   | 0.6470588 | Moderate  |
| Nakao et al., 2015            | 1  | 1  | 0  | 1  | 1  | 0  | 1  | 1  | 0   | 1   | 1   | 1   | 1   | 1   | 0   | 1   | 0   | 0.7058824 | Low       |
| Nakao et al., 2010            | 1  | 1  | 0  | 1  | 1  | 1  | 1  | 1  | 1   | 1   | 1   | 1   | 1   | 1   | 1   | 0   | 0   | 0.8235294 | Low       |
| Ndeereh et al., 2017 (a)      | 1  | 1  | 0  | 1  | 1  | 0  | 1  | 1  | 1   | 1   | 1   | 1   | 0   | 1   | 0   | 1   | 1   | 0.7647059 | Low       |
| Ndip et al., 2010             | 1  | 1  | 0  | 1  | 0  | 0  | 1  | 1  | 0   | 0   | 1   | 1   | 1   | 1   | 0   | 0   | 0   | 0.5294118 | Moderate  |
| Ndip et al., 2007             | 1  | 1  | 0  | 1  | 0  | 0  | 1  | 1  | 0   | 1   | 0   | 1   | 1   | 1   | 0   | 0   | 0   | 0.5294118 | Moderate  |
| Norte et al., 2021            | 1  | 1  | 0  | 1  | 1  | 0  | 1  | 1  | 1   | 1   | 1   | 1   | 1   | 1   | 0   | 1   | 1   | 0.8235294 | Low       |
| Olivieri et al., 2021         | 1  | 1  | 0  | 1  | 1  | 0  | 1  | 1  | 1   | 1   | 1   | 0   | 1   | 1   | 0   | 1   | 1   | 0.7647059 | Low       |
| Omondi et al., 2017           | 1  | 1  | 0  | 1  | 0  | 0  | 1  | 1  | 0   | 1   | 1   | 1   | 1   | 1   | 0   | 1   | 1   | 0.7058824 | Low       |
| Onyiche et al., 2020          | 1  | 1  | 0  | 1  | 0  | 0  | 1  | 1  | 0   | 0   | 0   | 1   | 0   | 1   | 0   | 1   | 1   | 0.5294118 | Moderate  |
| Ouedraogo et al., 2021        | 1  | 1  | 0  | 1  | 1  | 1  | 1  | 1  | 1   | 1   | 0   | 1   | 0   | 1   | 1   | 1   | 1   | 0.8235294 | Low       |
| Parola et al., 2001           | 0  | 0  | 0  | 0  | 0  | 0  | 0  | 1  | 0   | 0   | 0   | 1   | 0   | 0   | 0   | 0   | 0   | 0.1176471 | High      |
| Peter et al., 1999 (a)        | 1  | 1  | 1  | 1  | 0  | 1  | 1  | 1  | 1   | 1   | 1   | 1   | 1   | 1   | 1   | 0   | 0   | 0.8235294 | Low       |
| Peter et al., 1999 (b)        | 1  | 1  | 0  | 1  | 0  | 0  | 0  | 1  | 1   | 1   | 1   | 1   | 1   | 1   | 0   | 0   | 0   | 0.5882353 | Moderate  |
| Pothmann et al., 2016         | 1  | 1  | 0  | 1  | 1  | 1  | 1  | 1  | 1   | 1   | 1   | 1   | 1   | 1   | 0   | 0   | 0   | 0.7647059 | Low       |
| Proboste et al., 2015         | 1  | 1  | 0  | 1  | 0  | 0  | 1  | 1  | 1   | 1   | 1   | 1   | 0   | 1   | 1   | 1   | 0   | 0.7058824 | Low       |
| Rahal et al., 2020            | 1  | 1  | 0  | 1  | 1  | 1  | 1  | 1  | 1   | 1   | 0   | 1   | 0   | 1   | 0   | 1   | 1   | 0.7647059 | Low       |
| Reeves et al., 2020           | 0  | 0  | 0  | 1  | 0  | 0  | 0  | 1  | 0   | 1   | 1   | 1   | 1   | 1   | 1   | 0   | 0   | 0.4705882 | High      |
| Sambou et al., 2014           | 1  | 1  | 0  | 1  | 1  | 0  | 1  | 1  | 0   | 1   | 1   | 1   | 1   | 1   | 0   | 1   | 0   | 0.7058824 | Low       |
| Sanogo et al., 2003           | 1  | 1  | 0  | 1  | 0  | 0  | 0  | 1  | 0   | 1   | 0   | 1   | 1   | 1   | 1   | 0   | 0   | 0.5294118 | Moderate  |
| Sarih et al., 2008            | 1  | 1  | 0  | 1  | 0  | 0  | 1  | 1  | 0   | 1   | 0   | 1   | 1   | 1   | 0   | 0   | 0   | 0.5294118 | Moderate  |
| Sarin et al., 2005            | 1  | 1  | 0  | 1  | 0  | 0  | 1  | 1  | 0   | 1   | 1   | 1   | 1   | 1   | 0   | 0   | 0   | 0.5882353 | Moderate  |
| Selmi et al., 2020 (a)        | 1  | 1  | 1  | 1  | 1  | 0  | 1  | 1  | 1   | 1   | 1   | 1   | 1   | 1   | 0   | 1   | 1   | 0.8823529 | Low       |
| Selmi et al., 2020 (b)        | 1  | 1  | 1  | 1  | 1  | 0  | 1  | 1  | 1   | 1   | 1   | 1   | 1   | 1   | 0   | 1   | 1   | 0.8823529 | Low       |
| Selmi et al., 2019 (a)        | 1  | 1  | 1  | 1  | 1  | 0  | 1  | 1  | 1   | 1   | 0   | 1   | 1   | 1   | 0   | 1   | 1   | 0.8235294 | Low       |
| Selmi et al., 2019 (b)        | 1  | 1  | 1  | 1  | 1  | 0  | 1  | 1  | 1   | 1   | 1   | 1   | 1   | 1   | 0   | 1   | 1   | 0.8823529 | Low       |
| Sfar et al., 2008             | 1  | 1  | 0  | 1  | 0  | 0  | 1  | 1  | 0   | 1   | 1   | 1   | 0   | 1   | 0   | 0   | 0   | 0.5294118 | Moderate  |
| Shuaib et al., 2020           | 1  | 1  | 0  | 1  | 0  | 0  | 1  | 1  | 0   | 1   | 0   | 1   | 1   | 1   | 1   | 1   | 0   | 0.6470588 | Moderate  |
| Socolovschi et al., 2012      | 1  | 1  | 0  | 1  | 0  | 0  | 1  | 1  | 0   | 1   | 1   | 1   | 1   | 1   | 0   | 0   | 0   | 0.5882353 | Moderate  |
| Socolovschi et al., 2007      | 0  | 0  | 0  | 1  | 0  | 0  | 1  | 1  | 0   | 1   | 1   | 1   | 1   | 1   | 1   | 0   | 0   | 0.5294118 | Moderate  |
| Sulyok et al., 2014           | 1  | 1  | 0  | 1  | 0  | 0  | 1  | 1  | 0   | 0   | 0   | 1   | 0   | 1   | 0   | 1   | 0   | 0.4705882 | High      |
| Teshale et al., 2015          | 1  | 1  | 0  | 1  | 0  | 0  | 1  | 1  | 0   | 0   | 0   | 1   | 0   | 1   | 0   | 0   | 0   | 0.4117647 | High      |
| Teshale et al., 2016          | 1  | 1  | 0  | 1  | 0  | 0  | 1  | 1  | 0   | 1   | 1   | 1   | 1   | 1   | 1   | 1   | 1   | 0.7647059 | Low       |
| Tomassone et al., 2016        | 0  | 0  | 0  | 1  | 0  | 0  | 1  | 1  | 1   | 1   | 0   | 1   | 1   | 1   | 1   | 0   | 0   | 0.5294118 | Moderate  |
| Tucker et al., 2021           | 0  | 0  | 0  | 1  | 0  | 0  | 0  | 1  | 0   | 1   | 0   | 1   | 1   | 1   | 1   | 1   | 0   | 0.4705882 | High      |
| Tufa et al., 2021             | 1  | 1  | 0  | 1  | 0  | 0  | 1  | 1  | 0   | 0   | 0   | 1   | 0   | 1   | 0   | 1   | 1   | 0.5294118 | Moderate  |
| Vanegas et al., 2018          | 0  | 0  | 0  | 1  | 0  | 0  | 0  | 1  | 1   | 1   | 1   | 1   | 1   | 1   | 1   | 1   | 0   | 0.5882353 | Moderate  |
| Wang'ang'a Oundo et al., 2020 | 1  | 1  | 0  | 1  | 0  | 0  | 1  | 1  | 0   | 1   | 1   | 1   | 1   | 1   | 0   | 1   | 1   | 0.7058824 | Low       |
| Yssouf et al., 2014           | 1  | 1  | 0  | 1  | 0  | 0  | 1  | 1  | 1   | 1   | 1   | 1   | 1   | 1   | 0   | 1   | 0   | 0.7058824 | Low       |

| Pub_authors                | Q1 | Q2 | Q3 | Q4 | Q5 | Q6 | Q8 | Q9 | Q10 | Q11 | Q12 | Q15 | Q16 | Q17 | Q18 | Q19 | Q20 | TOT       | Risk bias |
|----------------------------|----|----|----|----|----|----|----|----|-----|-----|-----|-----|-----|-----|-----|-----|-----|-----------|-----------|
| Znazen et al., 2013        | 1  | 1  | 0  | 1  | 0  | 0  | 1  | 1  | 0   | 1   | 1   | 1   | 1   | 1   | 1   | 1   | 1   | 0.7647059 | Low       |
| Iweriebor et al., 2017 (a) | 1  | 1  | 0  | 1  | 0  | 0  | 1  | 1  | 0   | 1   | 0   | 0   | 1   | 1   | 1   | 1   | 1   | 0.6470588 | Moderate  |
| Iweriebor et al., 2017 (b) | 0  | 0  | 0  | 1  | 0  | 0  | 0  | 1  | 0   | 1   | 1   | 0   | 1   | 1   | 1   | 1   | 1   | 0.5294118 | Moderate  |
| Abdullah et al., 2022      | 1  | 1  | 0  | 1  | 0  | 0  | 1  | 1  | 0   | 1   | 0   | 1   | 0   | 1   | 0   | 0   | 1   | 0.5294118 | Moderate  |
| AL-Hosary et al., 2021     | 1  | 1  | 0  | 1  | 0  | 0  | 1  | 1  | 0   | 0   | 0   | 0   | 0   | 0   | 0   | 1   | 0   | 0.3529412 | High      |
| Aouadi et al., 2022        | 1  | 1  | 0  | 1  | 0  | 1  | 1  | 1  | 0   | 1   | 1   | 1   | 1   | 1   | 0   | 1   | 1   | 0.7647059 | Low       |
| Benyahia et al., 2022      | 1  | 1  | 0  | 1  | 0  | 0  | 1  | 1  | 0   | 1   | 1   | 1   | 1   | 1   | 0   | 1   | 1   | 0.7058824 | Low       |
| Chitanga et al., 2021      | 1  | 2  | 0  | 0  | 0  | 0  | 1  | 1  | 1   | 1   | 0   | 1   | 0   | 1   | 0   | 1   | 0   | 0.5882353 | Moderate  |
| Elelu et al., 2022         | 0  | 0  | 0  | 0  | 0  | 0  | 0  | 1  | 0   | 1   | 0   | 1   | 0   | 1   | 0   | 1   | 1   | 0.3529412 | High      |
| Hegab et al., 2022         | 0  | 0  | 1  | 0  | 0  | 0  | 0  | 1  | 1   | 1   | 0   | 1   | 0   | 1   | 0   | 1   | 1   | 0.4705882 | High      |
| Hornok et al., 2022        | 1  | 1  | 0  | 1  | 0  | 0  | 1  | 1  | 0   | 1   | 0   | 1   | 0   | 1   | 0   | 0   | 0   | 0.4705882 | High      |
| Mediannikov et al., 2014   | 1  | 1  | 0  | 1  | 0  | 0  | 1  | 1  | 1   | 1   | 1   | 1   | 1   | 1   | 1   | 1   | 0   | 0.7647059 | Low       |
| Nimo-Paintsil et al., 2022 | 1  | 1  | 0  | 0  | 0  | 0  | 1  | 1  | 1   | 1   | 1   | 1   | 1   | 1   | 1   | 1   | 1   | 0.7647059 | Low       |
| Palomar et al., 2022       | 0  | 0  | 0  | 0  | 0  | 0  | 0  | 1  | 0   | 0   | 0   | 1   | 0   | 1   | 0   | 1   | 1   | 0.2941176 | High      |
| Qiu et al., 2021           | 1  | 1  | 0  | 1  | 0  | 0  | 1  | 1  | 0   | 1   | 1   | 1   | 1   | 1   | 1   | 1   | 0   | 0.7058824 | Low       |
| Said et al., 2021          | 1  | 1  | 0  | 1  | 0  | 0  | 1  | 1  | 1   | 1   | 1   | 1   | 1   | 1   | 0   | 1   | 1   | 0.7647059 | Low       |

1 means “yes” while 0 means “no”.
